# Supplementary material for: Ecology Drives the Distribution of Specialized Tyrosine Metabolism Modules in Fungi
Source: PubMed Central journal article supplement (PMC3914699; doi:10.1093/gbe/evt208), 2014-01-02
Supplement: supp_evt208_Greene_etal_Supplement_revised.pdf [file supp_evt208_Greene_etal_Supplement_revised.pdf]

## Supplemental Materials

**Figure S1.** Maximum likelihood analyses of protein alignments in this study. A = *hyp1*, B = *hyp2*, C = *hppD*, D = *hmgX*, E = *hmgA*, F = *fahA*, G = *hmgR*, H = *maiA*, I = *tspH*, J = *aspH*, K = *mfsG*, L = *fphG*, M = *sdoG*, N = *ctfG*, O = *gdoG*, P = *sahG*, Q = *adhG*, R = *mfsH*, S = *mfsBX*, T = *iclBX*, U = species tree.

**Figure S2.** Paralogous gentisate catabolism clusters.

**Figure S3.** Mauve alignments of gentisate catabolism (GC) cluster loci. A. *A. fumigatus* GC cluster and flanking sequences aligned with the *A. fischerianus* homologous locus. B. *A. niger* GC cluster and flanking sequences aligned with the *A. carbonarius* homologous locus. Matching colored histograms correspond to aligned sequence and direction is indicated by position of histograms above or below the horizontal axis.

**Figure S4.** Distribution and clustering of phenolic metabolism genes in Pezizomycotina fungi. Taxa on y-axis are ordered as in Figure 2 and abbreviated as in Table S1. Cell colors in the matrix indicate the following states: Black = no detected homologs, light blue = single homolog unclustered, dark blue = multiple homologs unclustered, pink = a single homolog, which is clustered, and red = multiple homologs with at least 1 clustered.

**Figure S5.** Alignment logos of A. bacterial, and B. fungal gentisate 1,2-dioxygenase amino acid sequences. Stack height at each position indicates residue conservation, and relative residue height within each position corresponds to the frequency it is encountered. Known functional positions (see table S2) indicate the corresponding residue in salicylate 1,2 dioxygenase in *Psuedaminobacter salicylatoxidans*.

**Table S1.** Genomes analyzed in this study.

**Table S2.** Comparison of function-related residues among gentisate 1,2 dioxygenase homologs in fungi and bacteria.

Monophyletic  
Dothidiomycete  
Constraint Tree

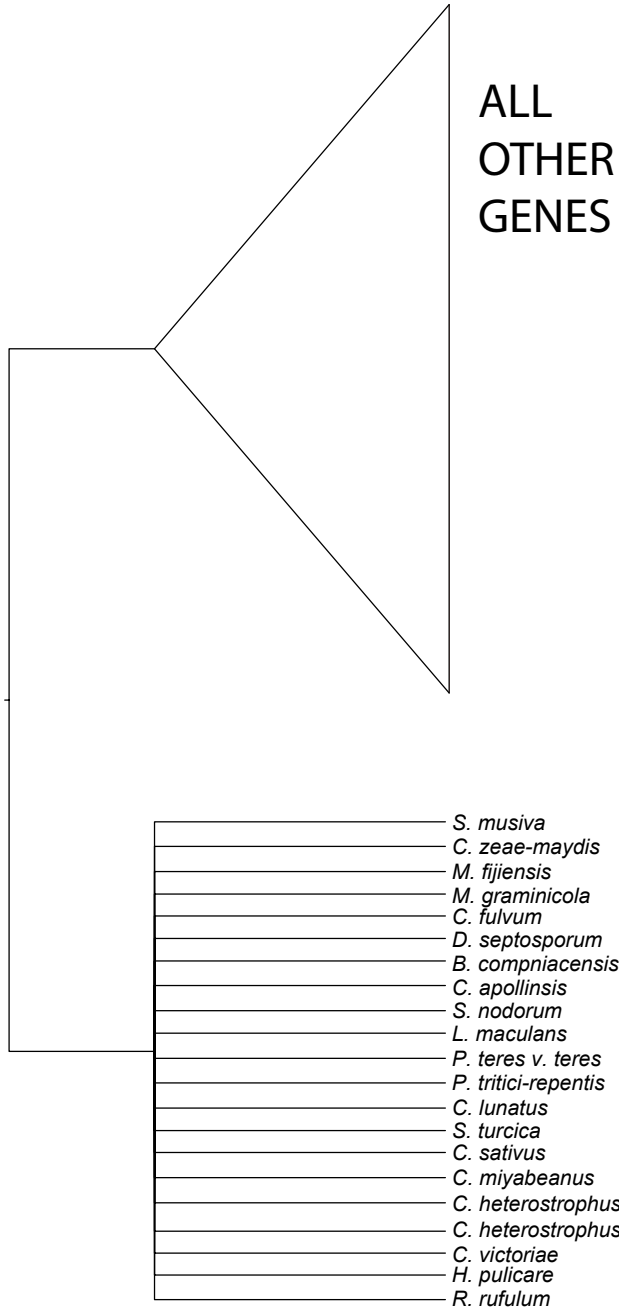

Monophyletic  
Sordariomycete  
Constraint Tree

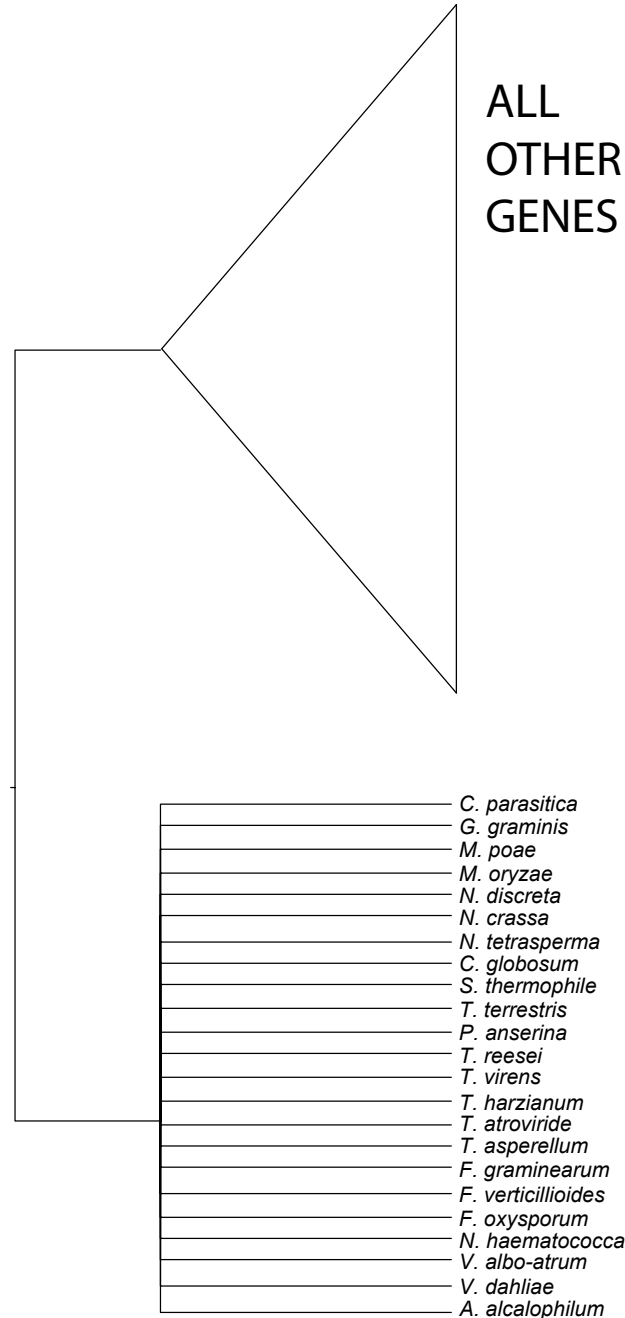

Monophyletic  
Eurotiomycete  
Constraint Tree

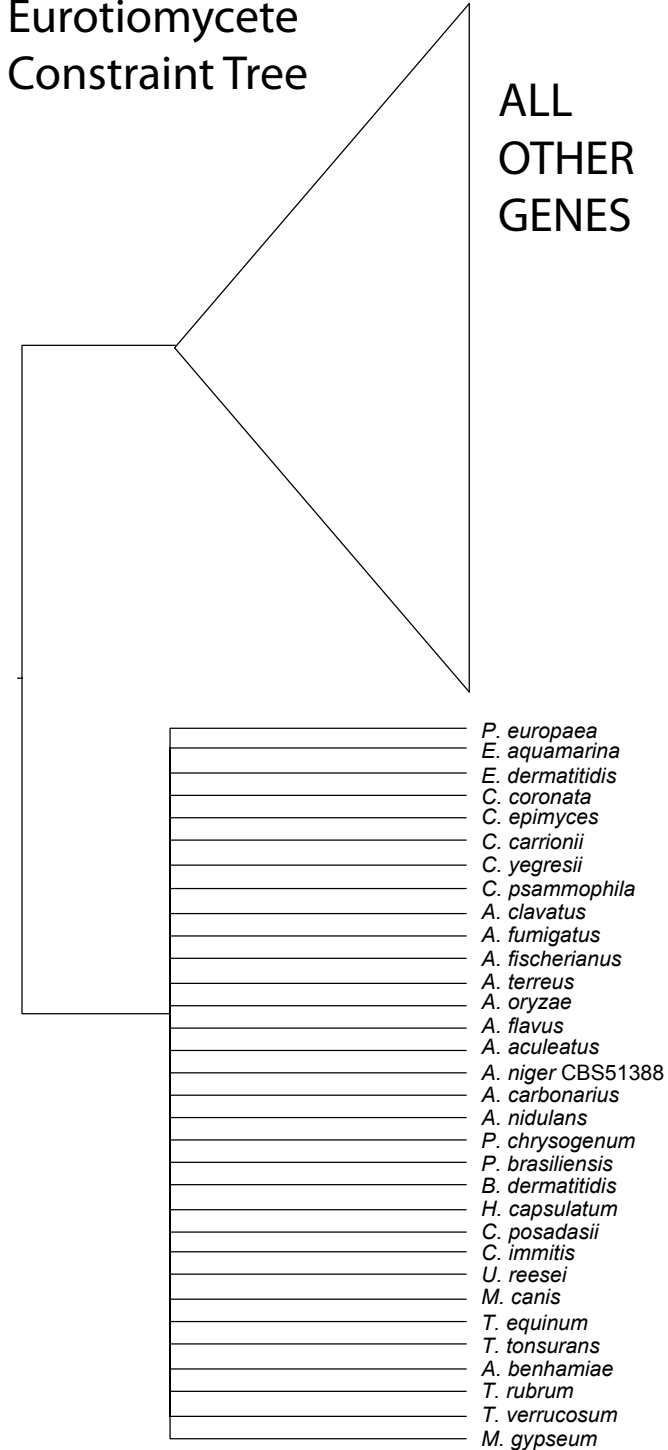

A. HYP1

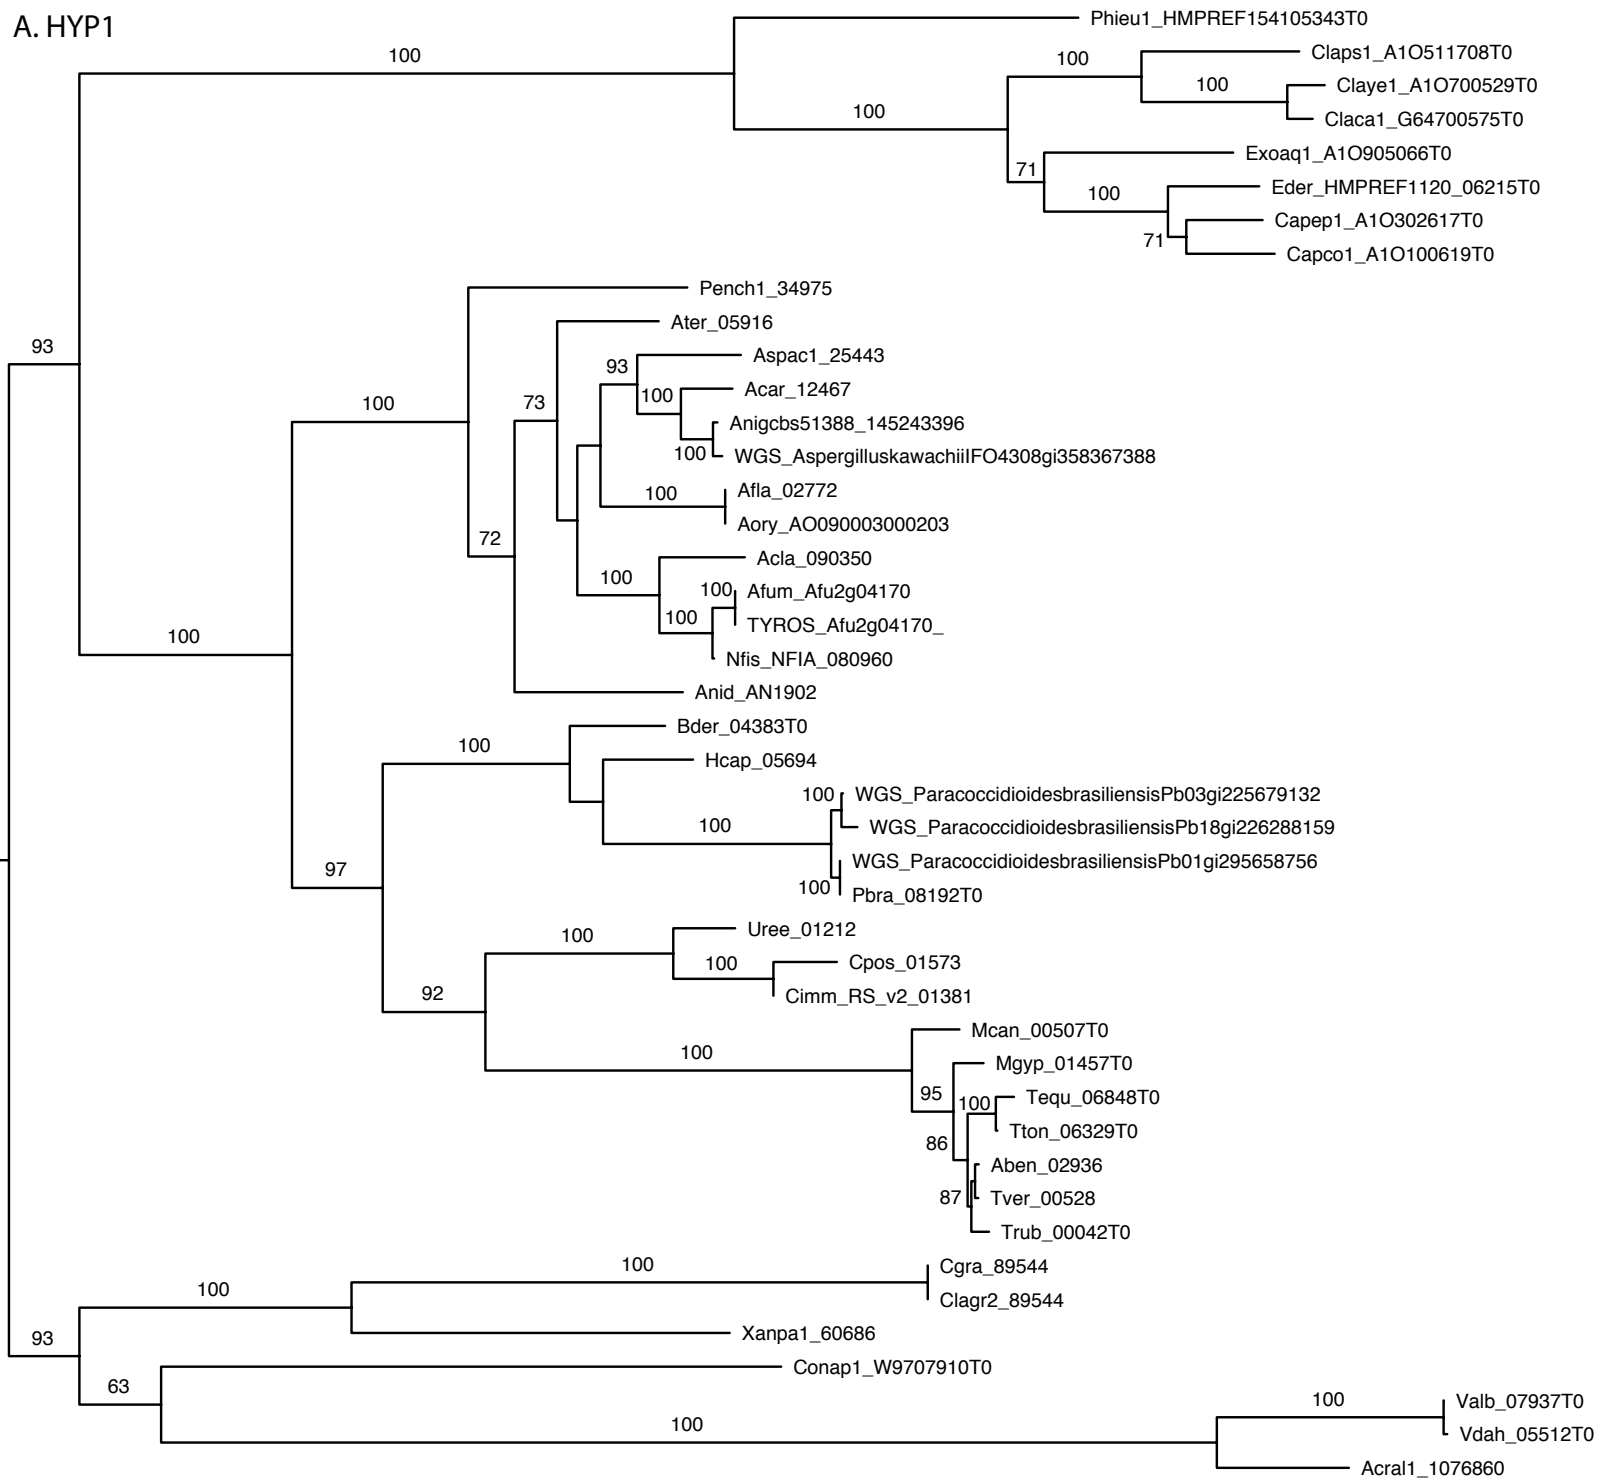

B. HYP2

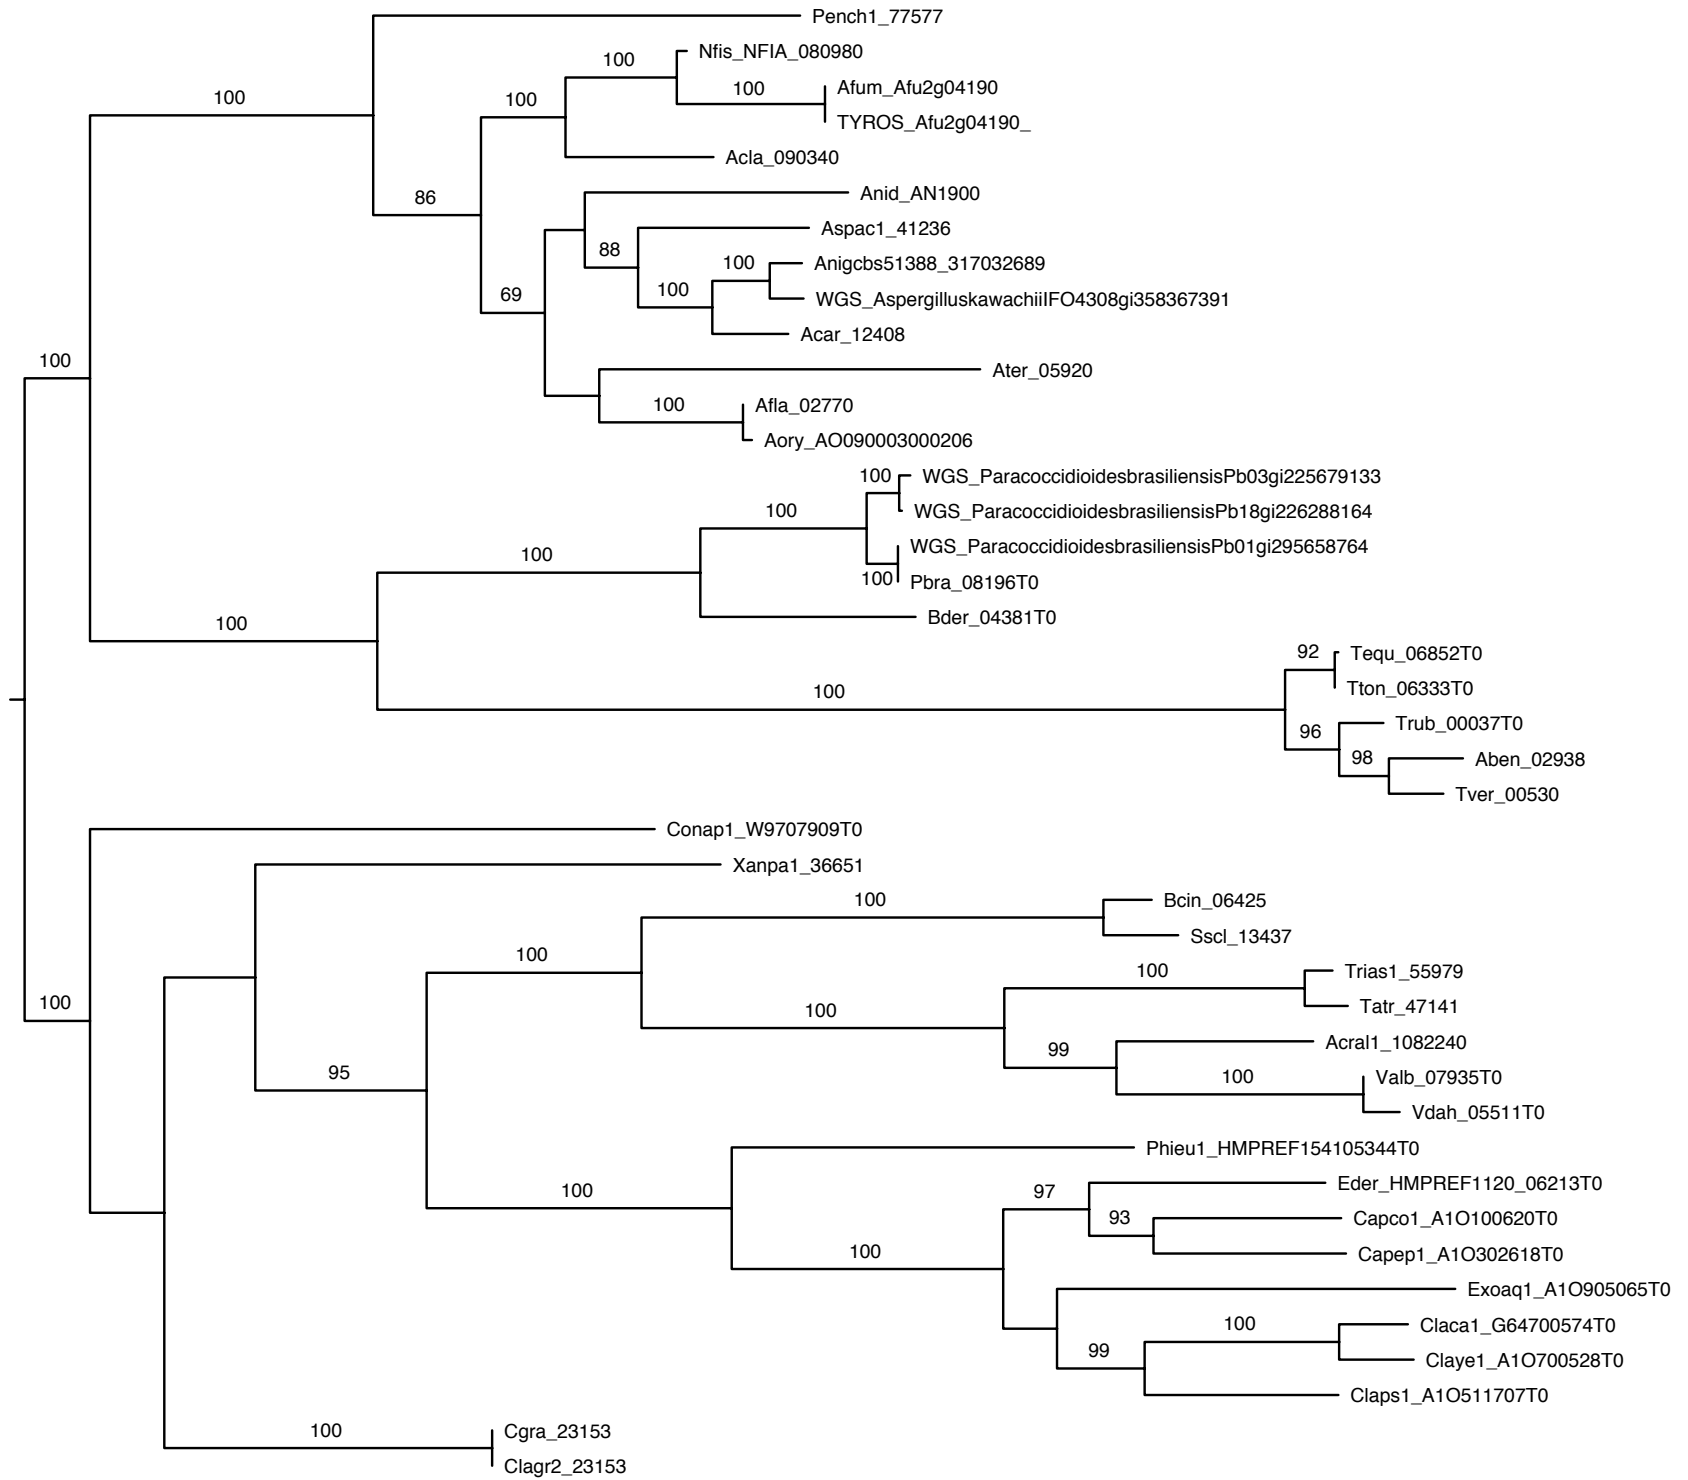

0.4

C. HPPD

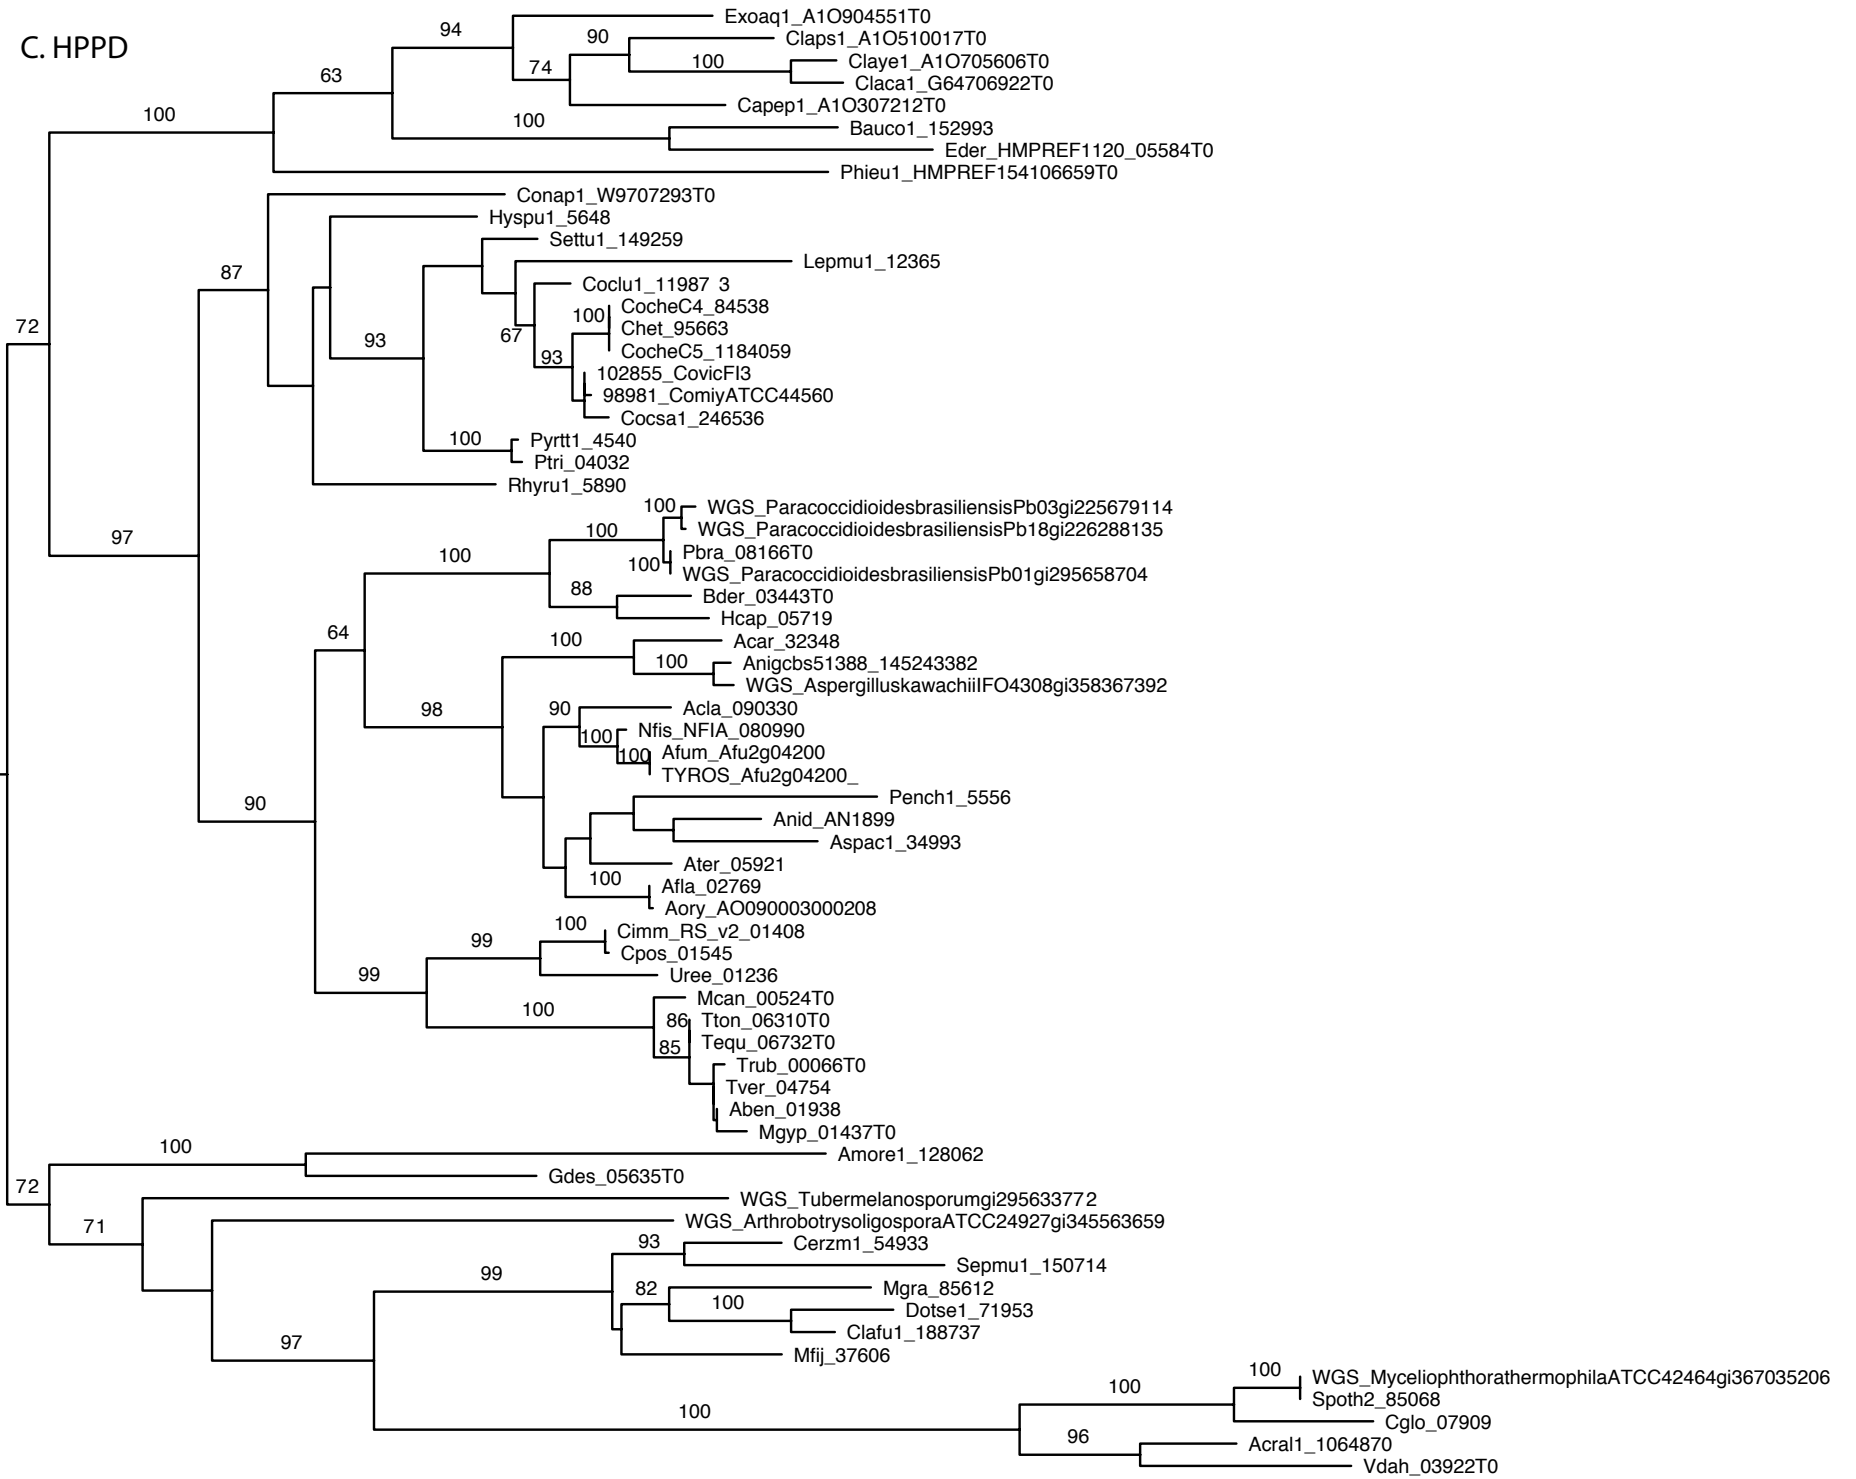

0.2

D. HMGX

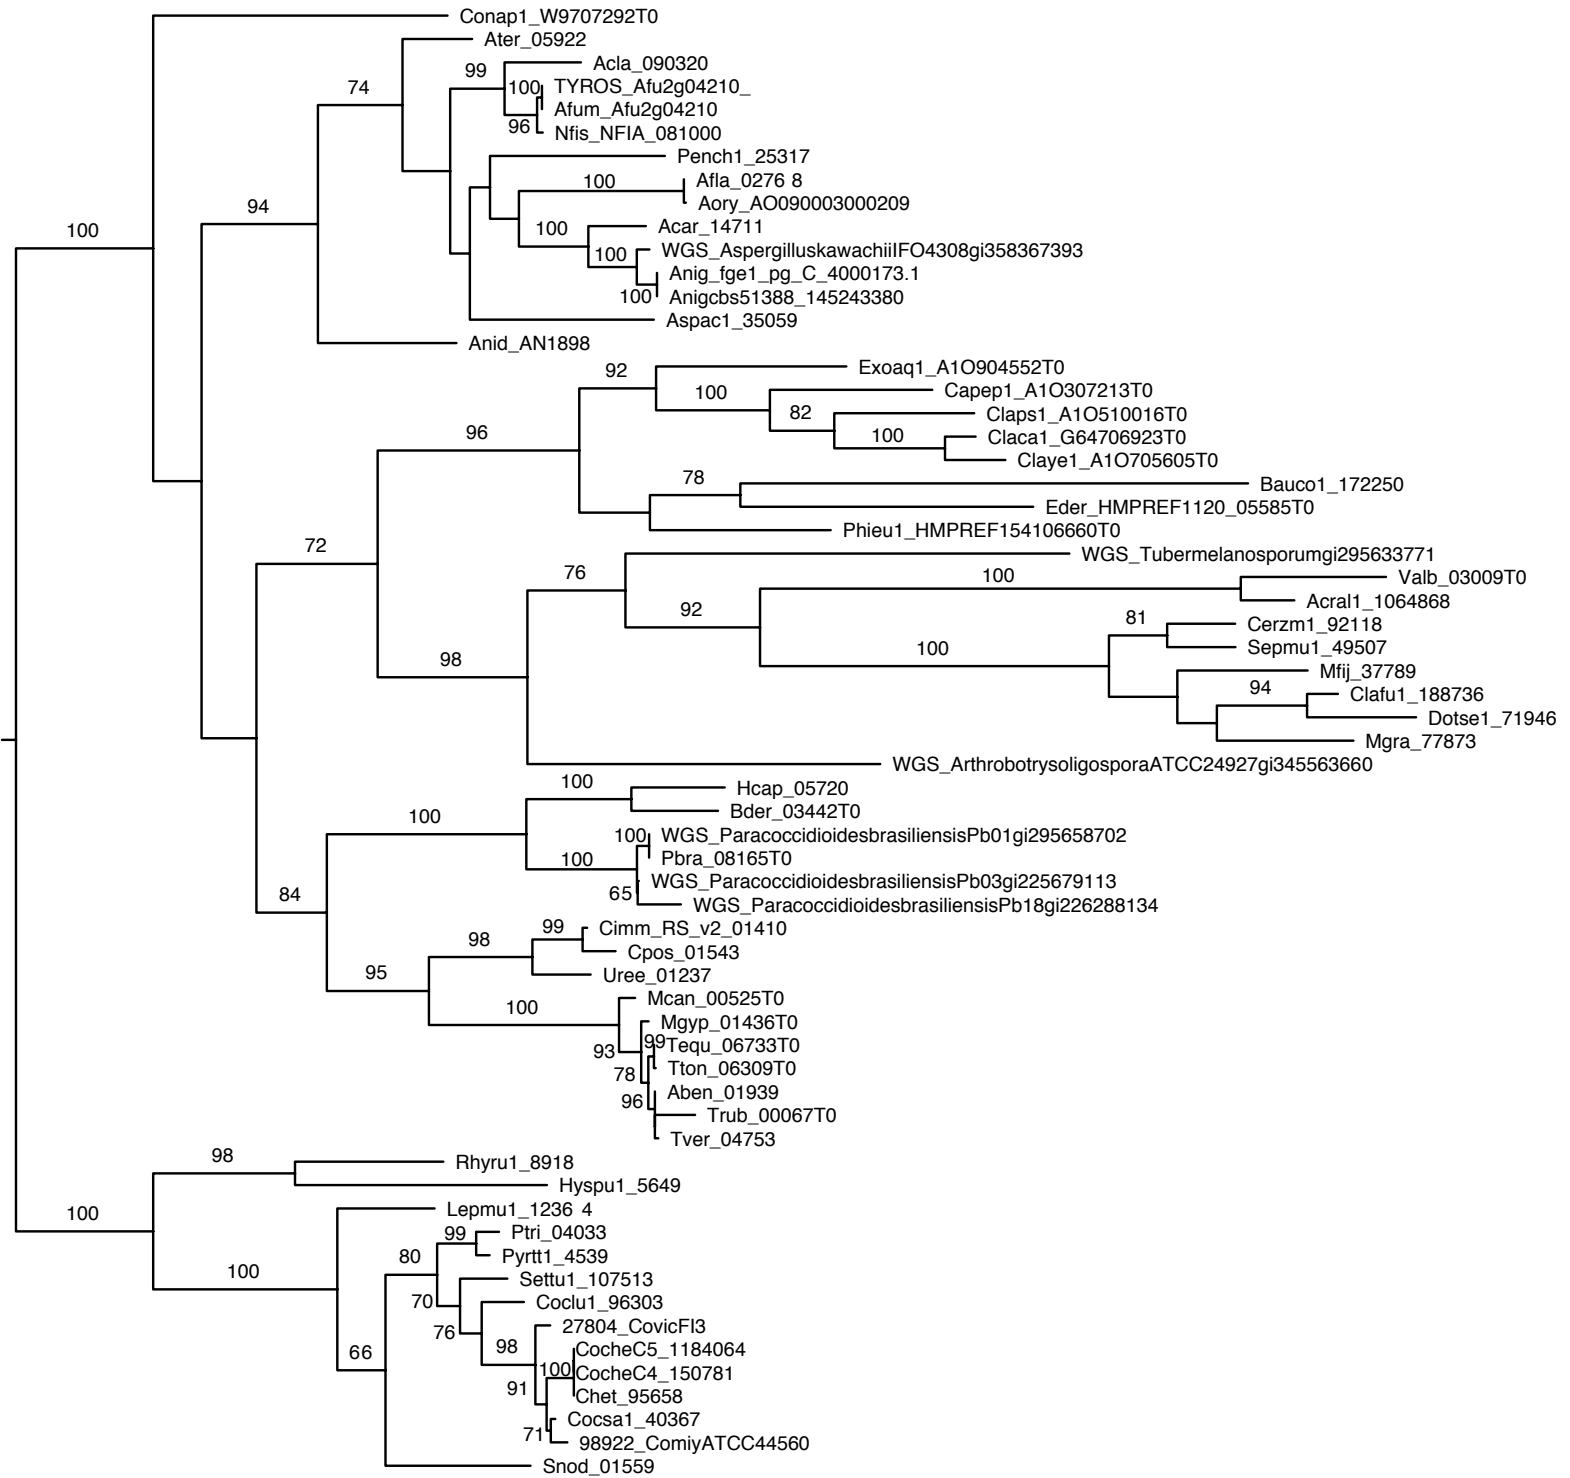

E. HMGA

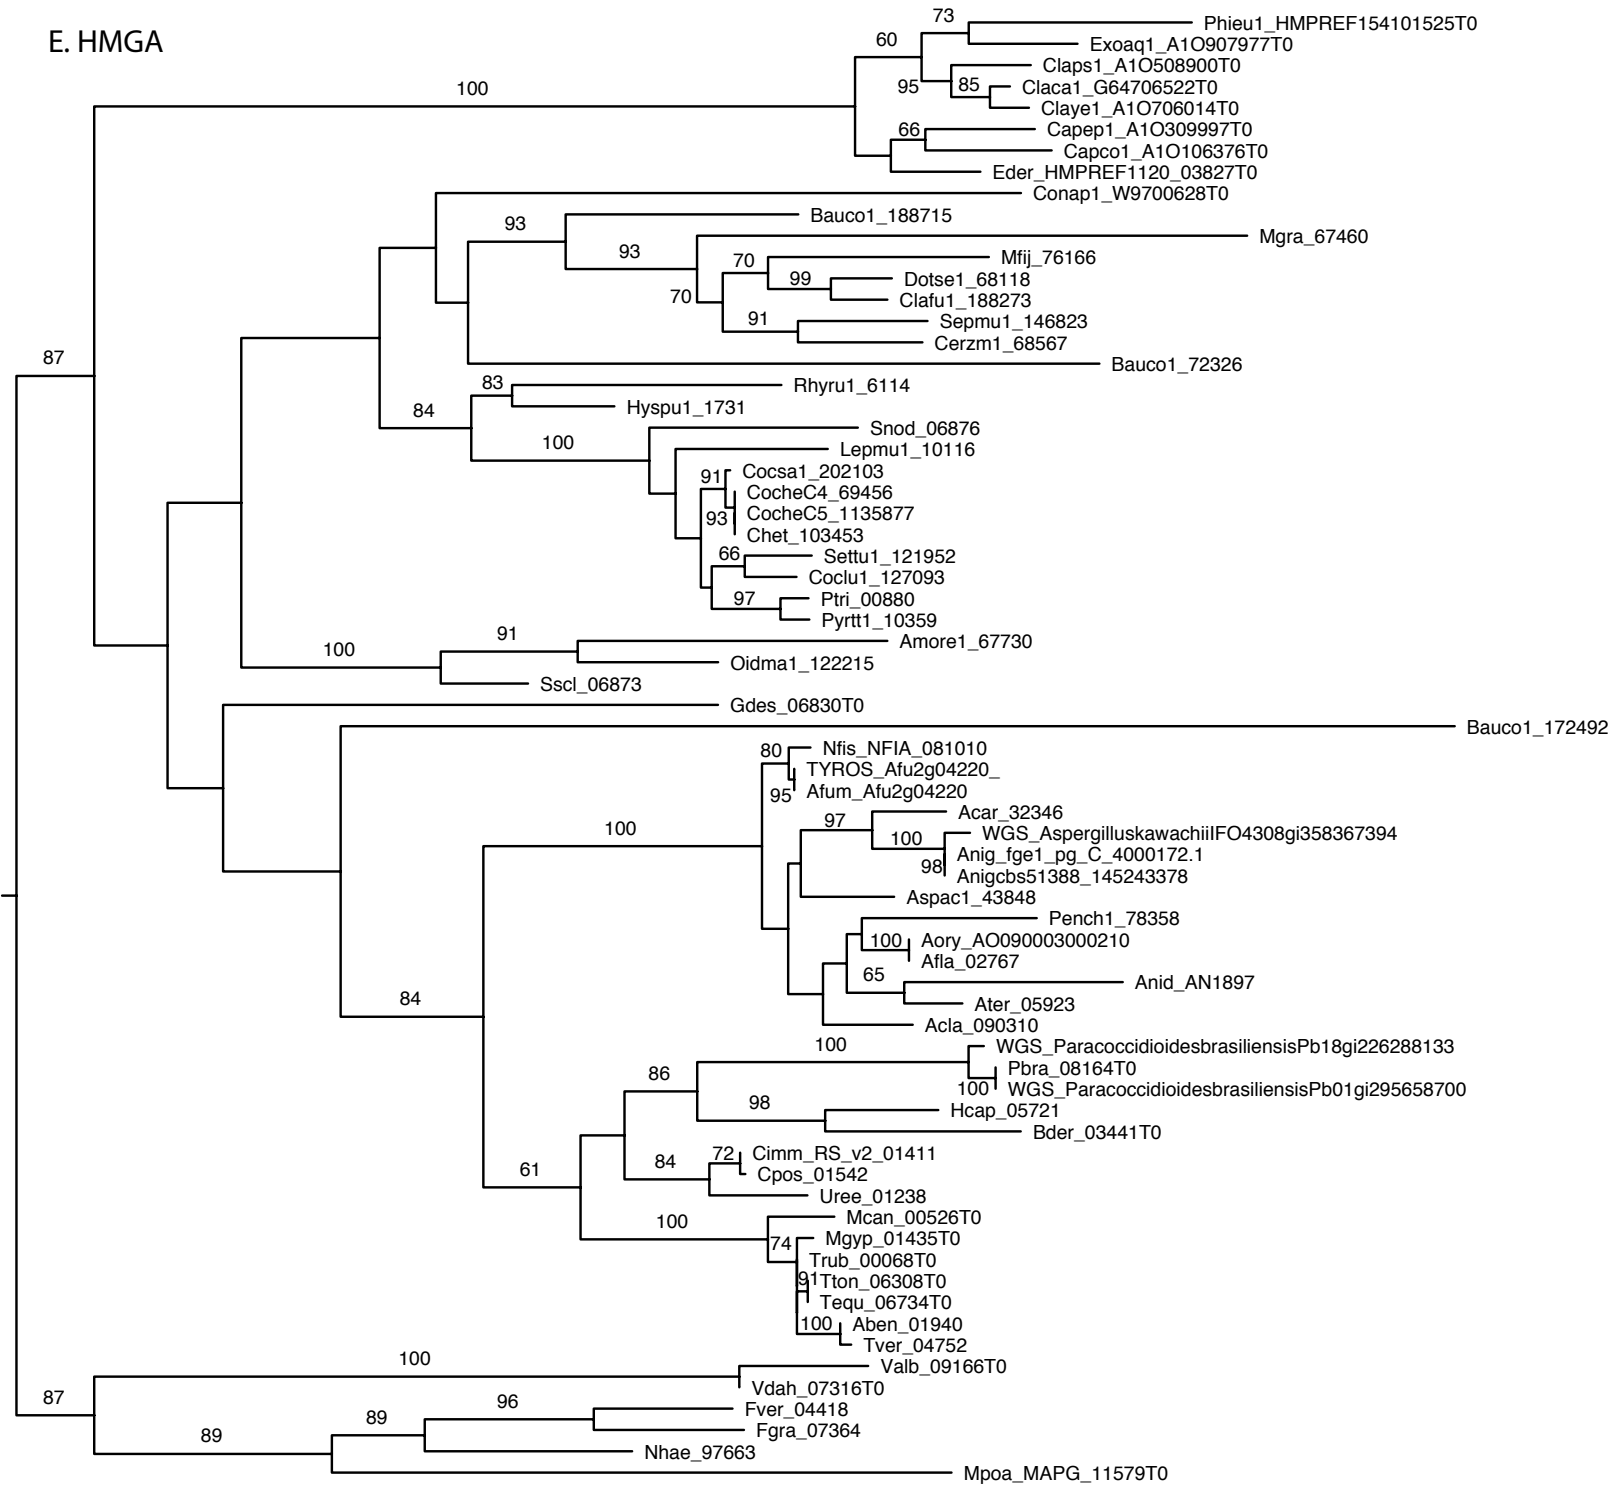

0.1

F. FAHA

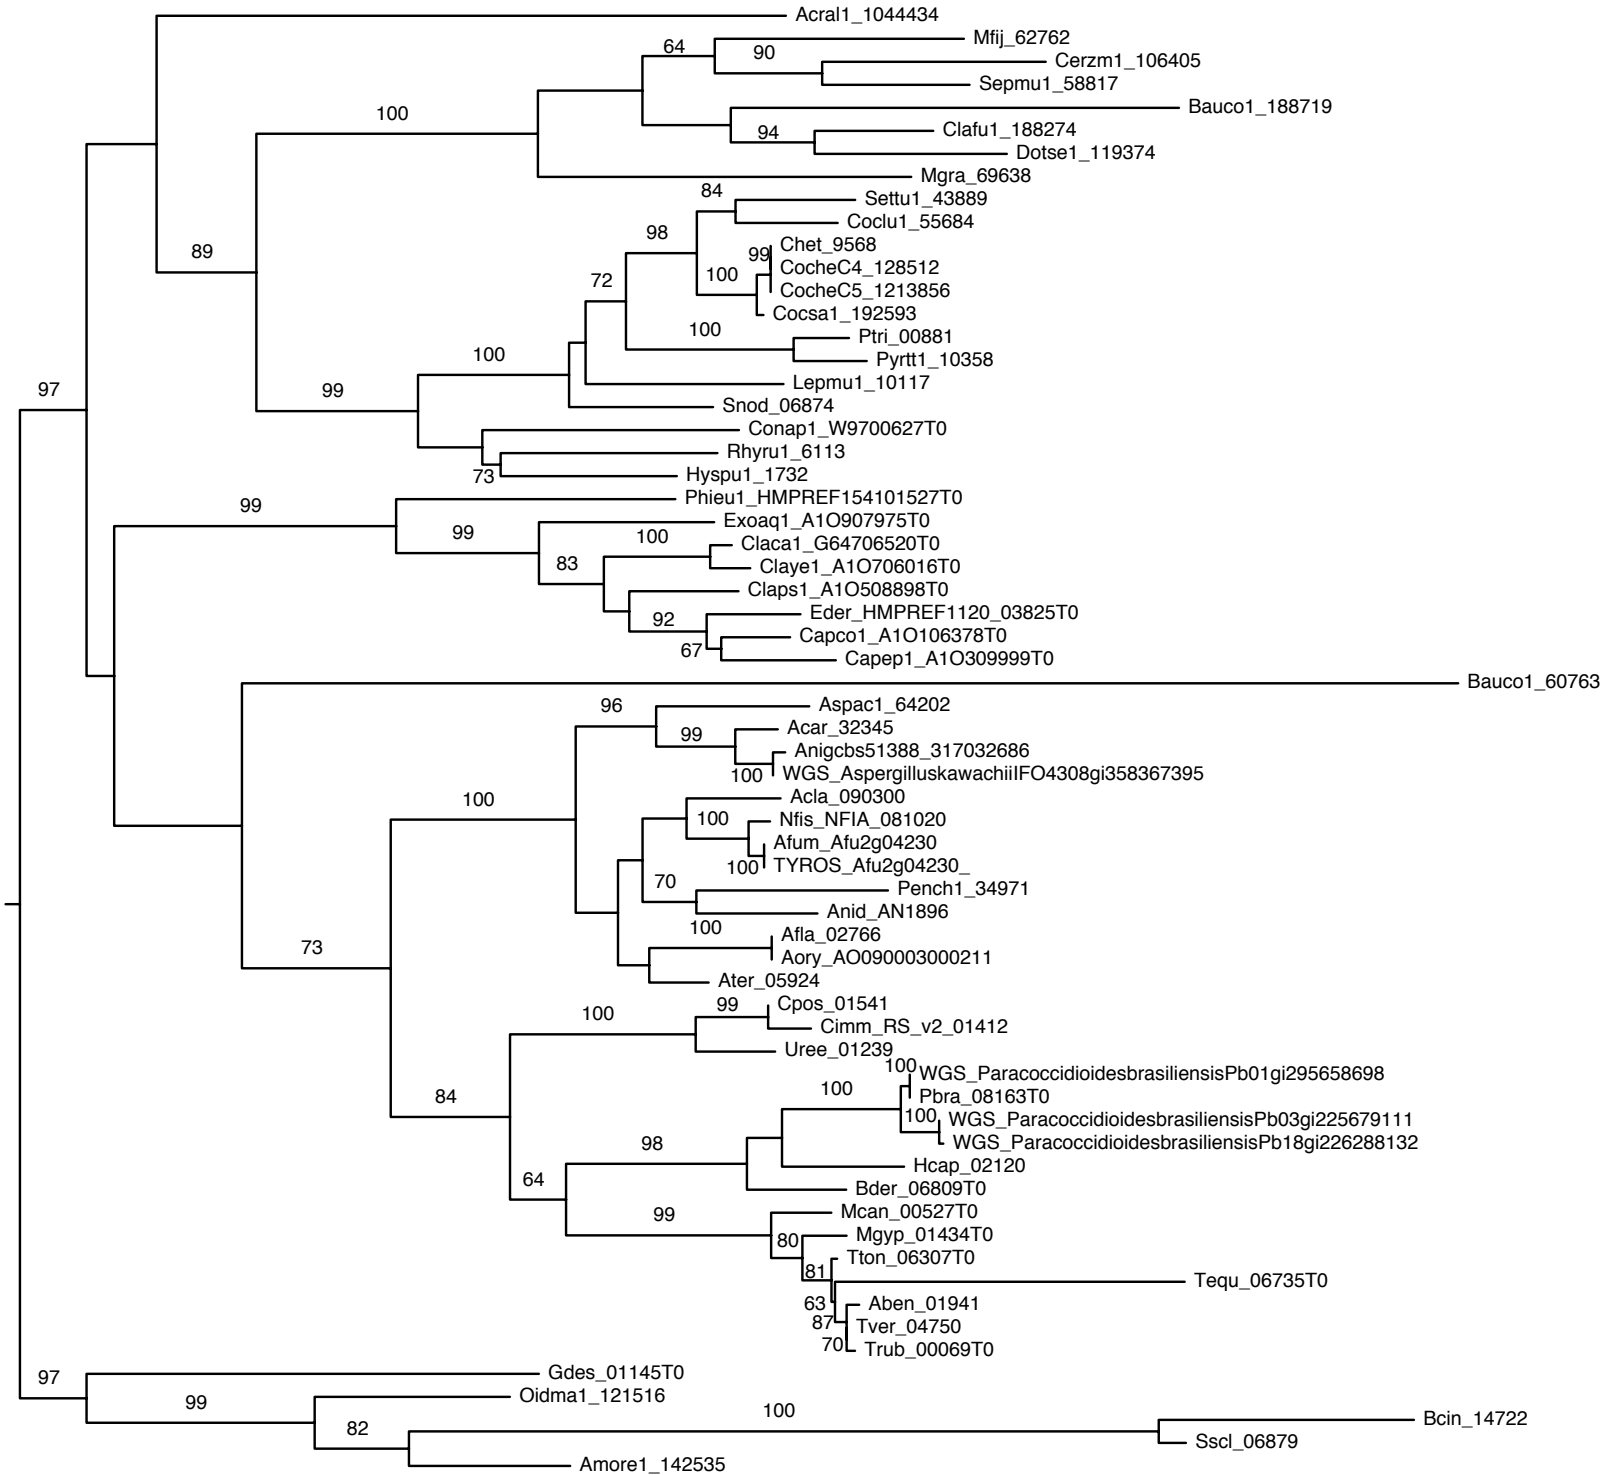

0.2



G. HMGR

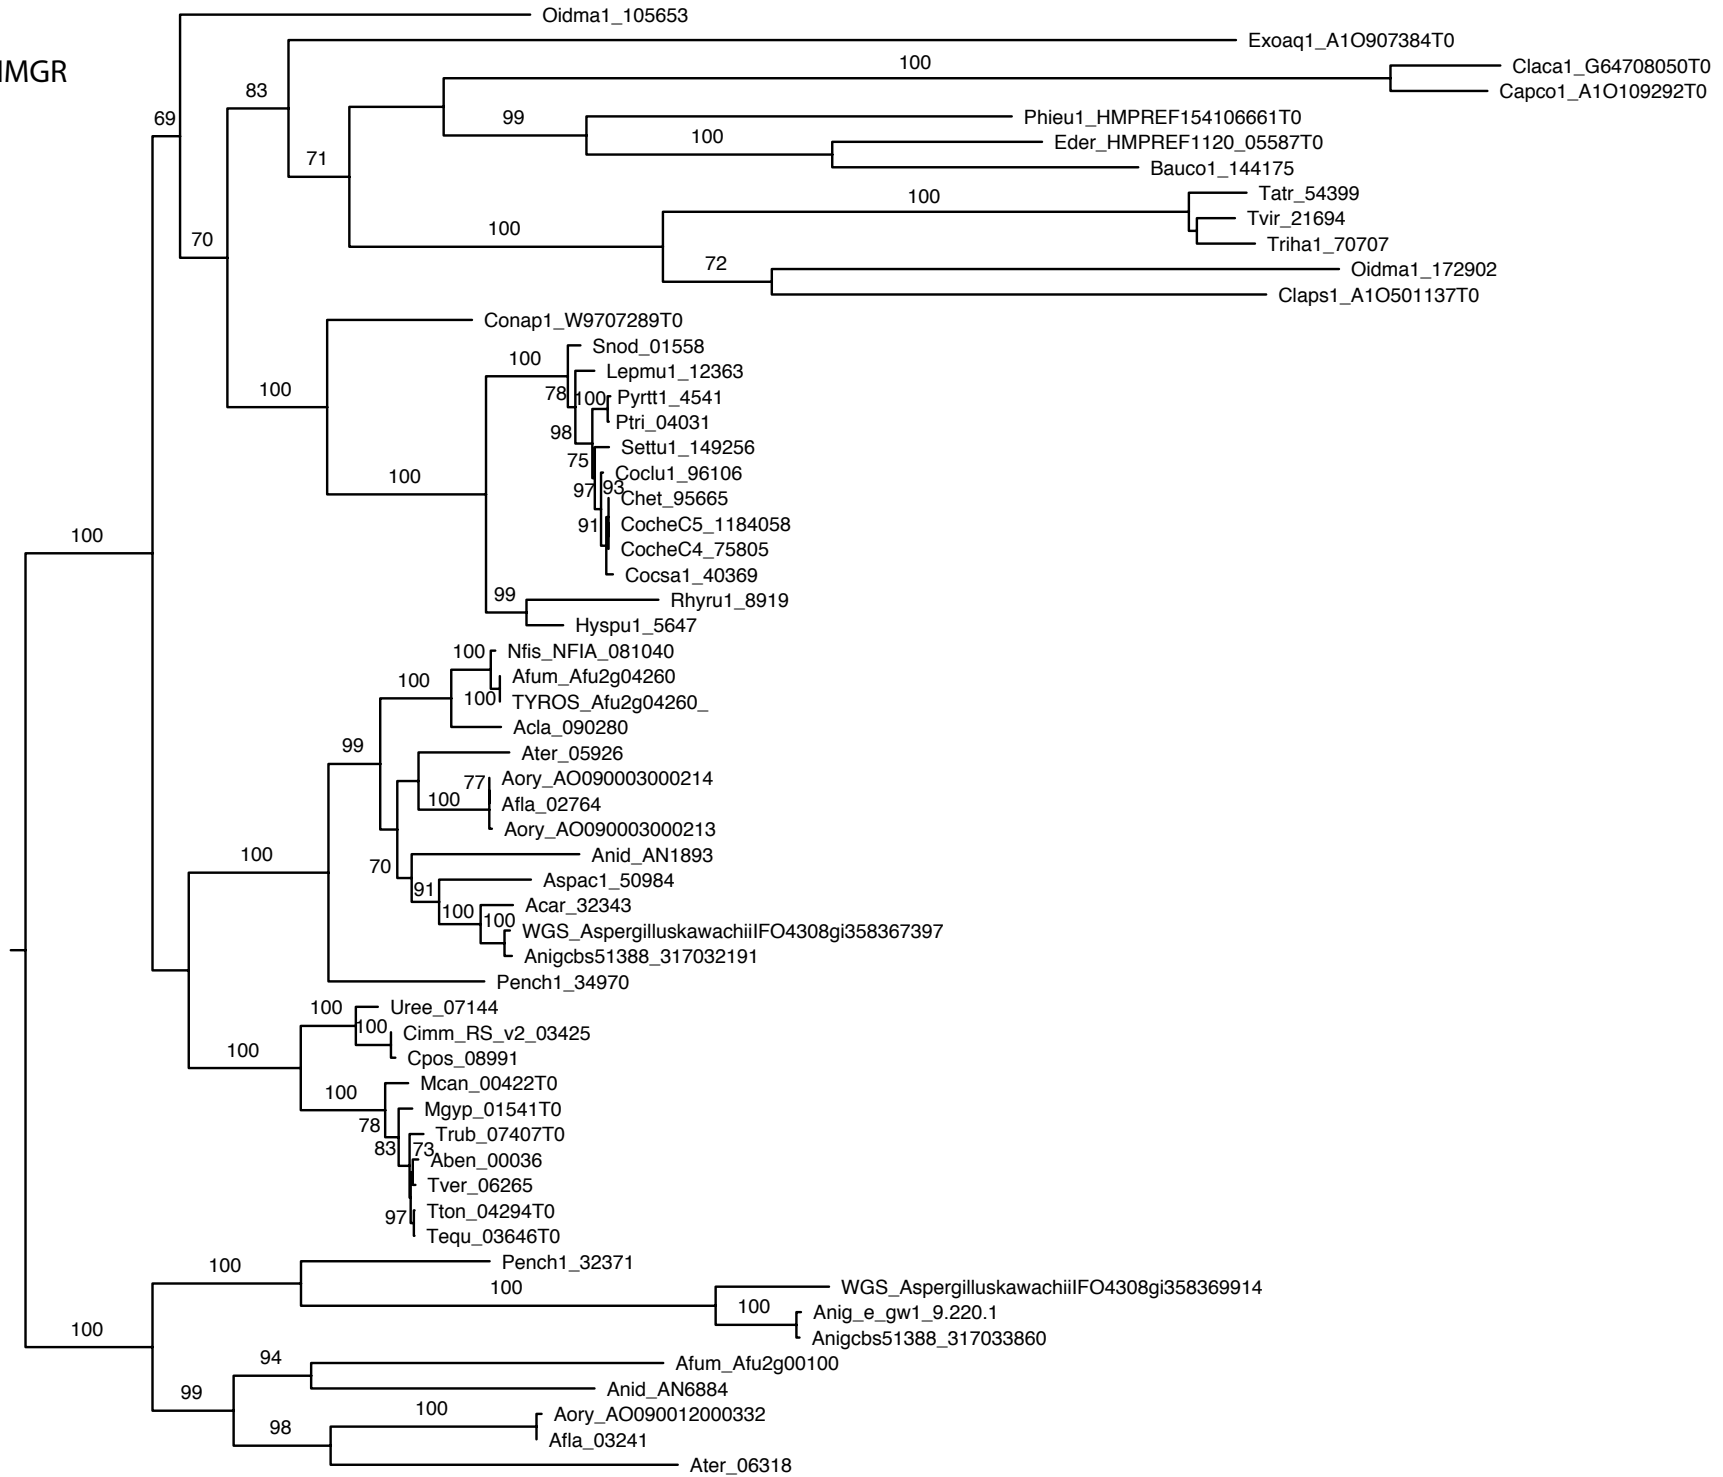

0.5

H. MAIA

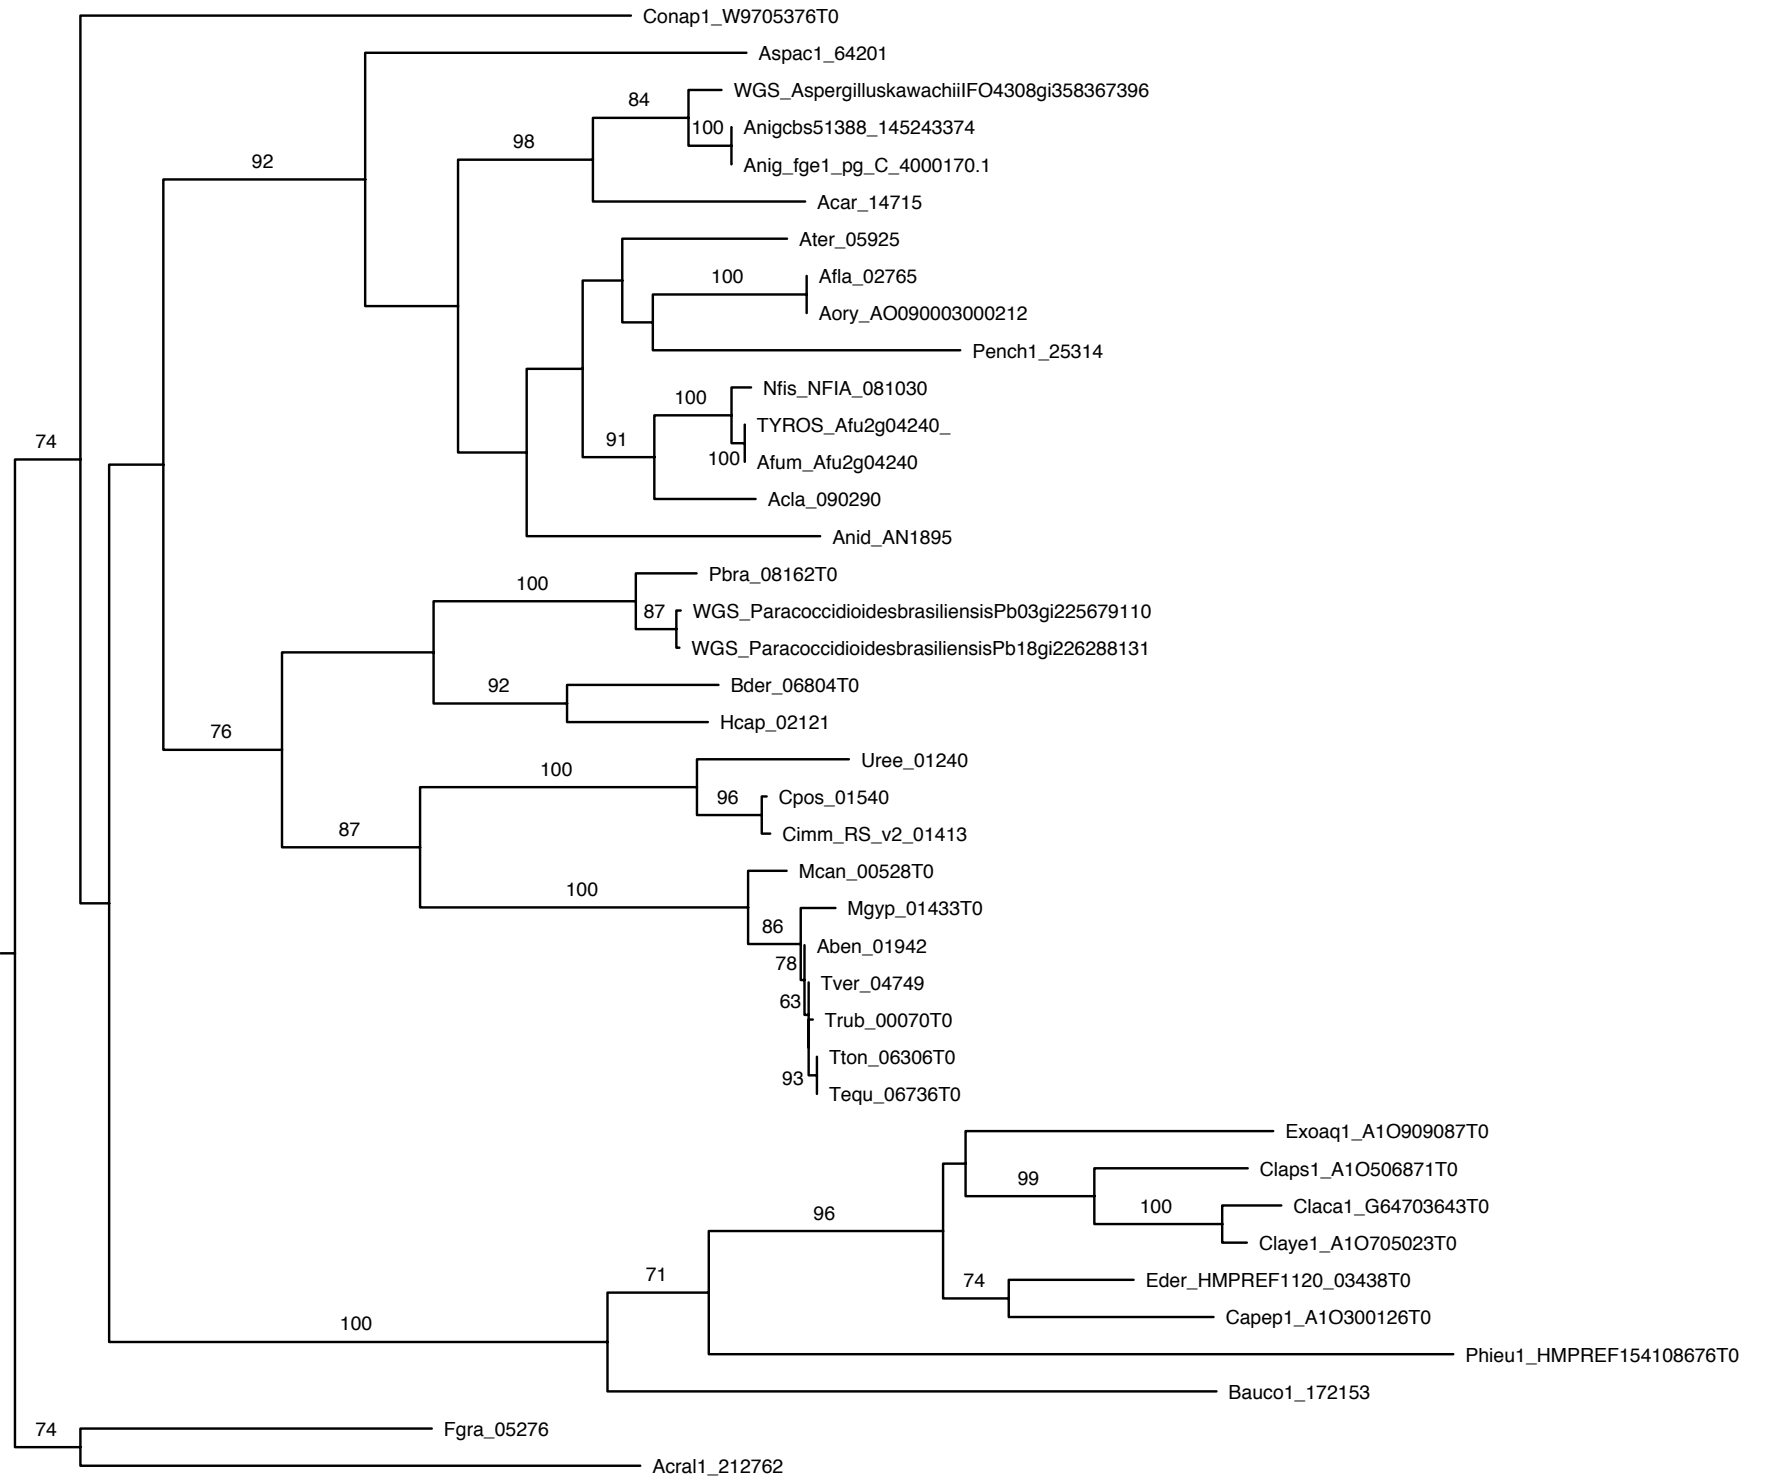

0.2

I. TSPH

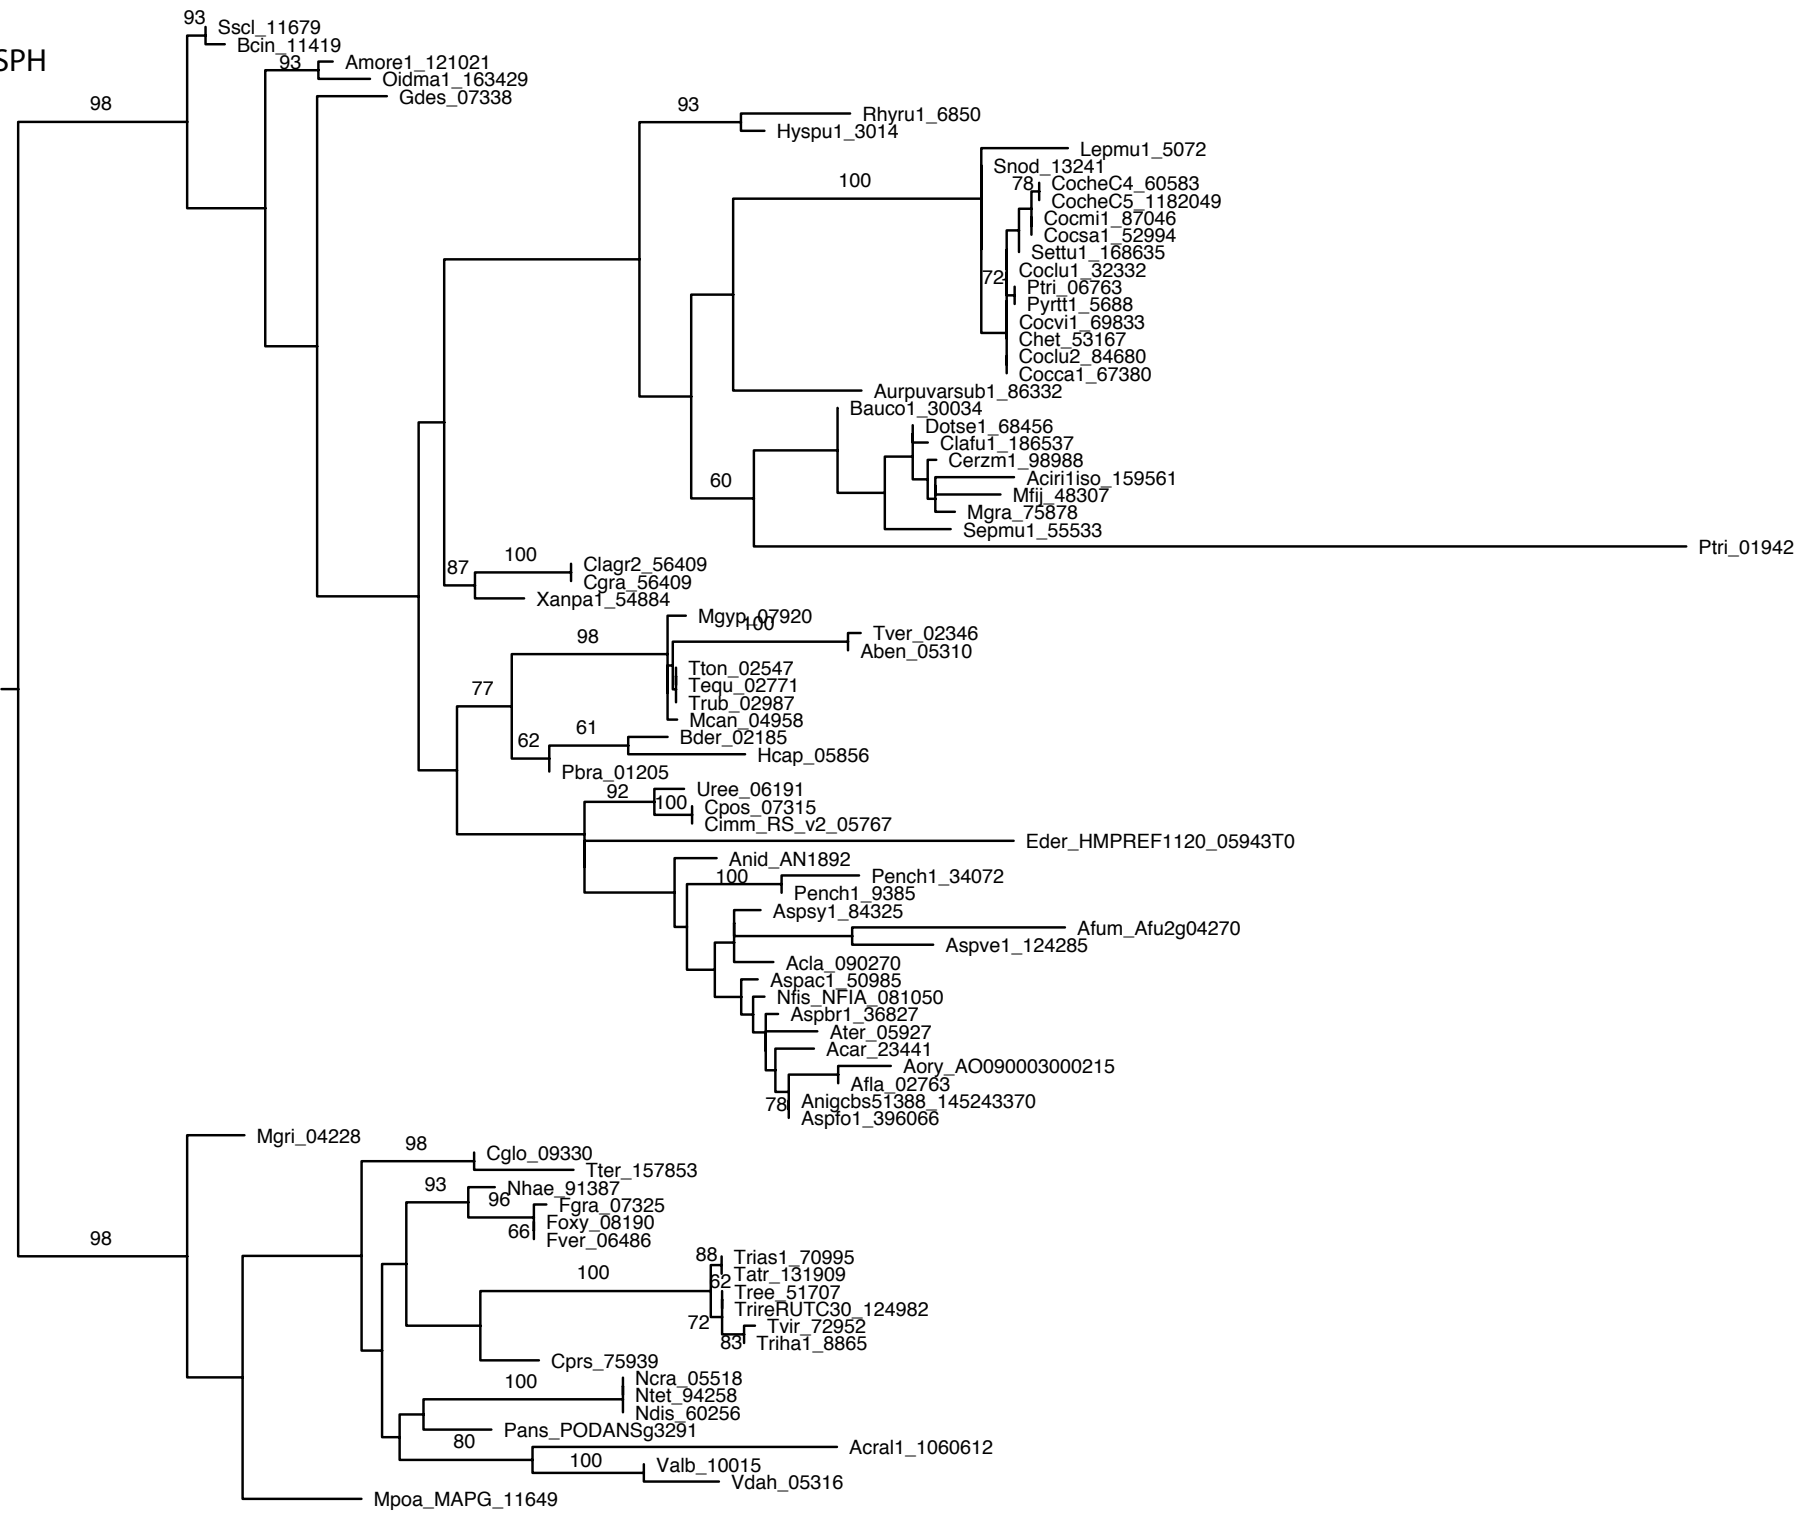

0.3

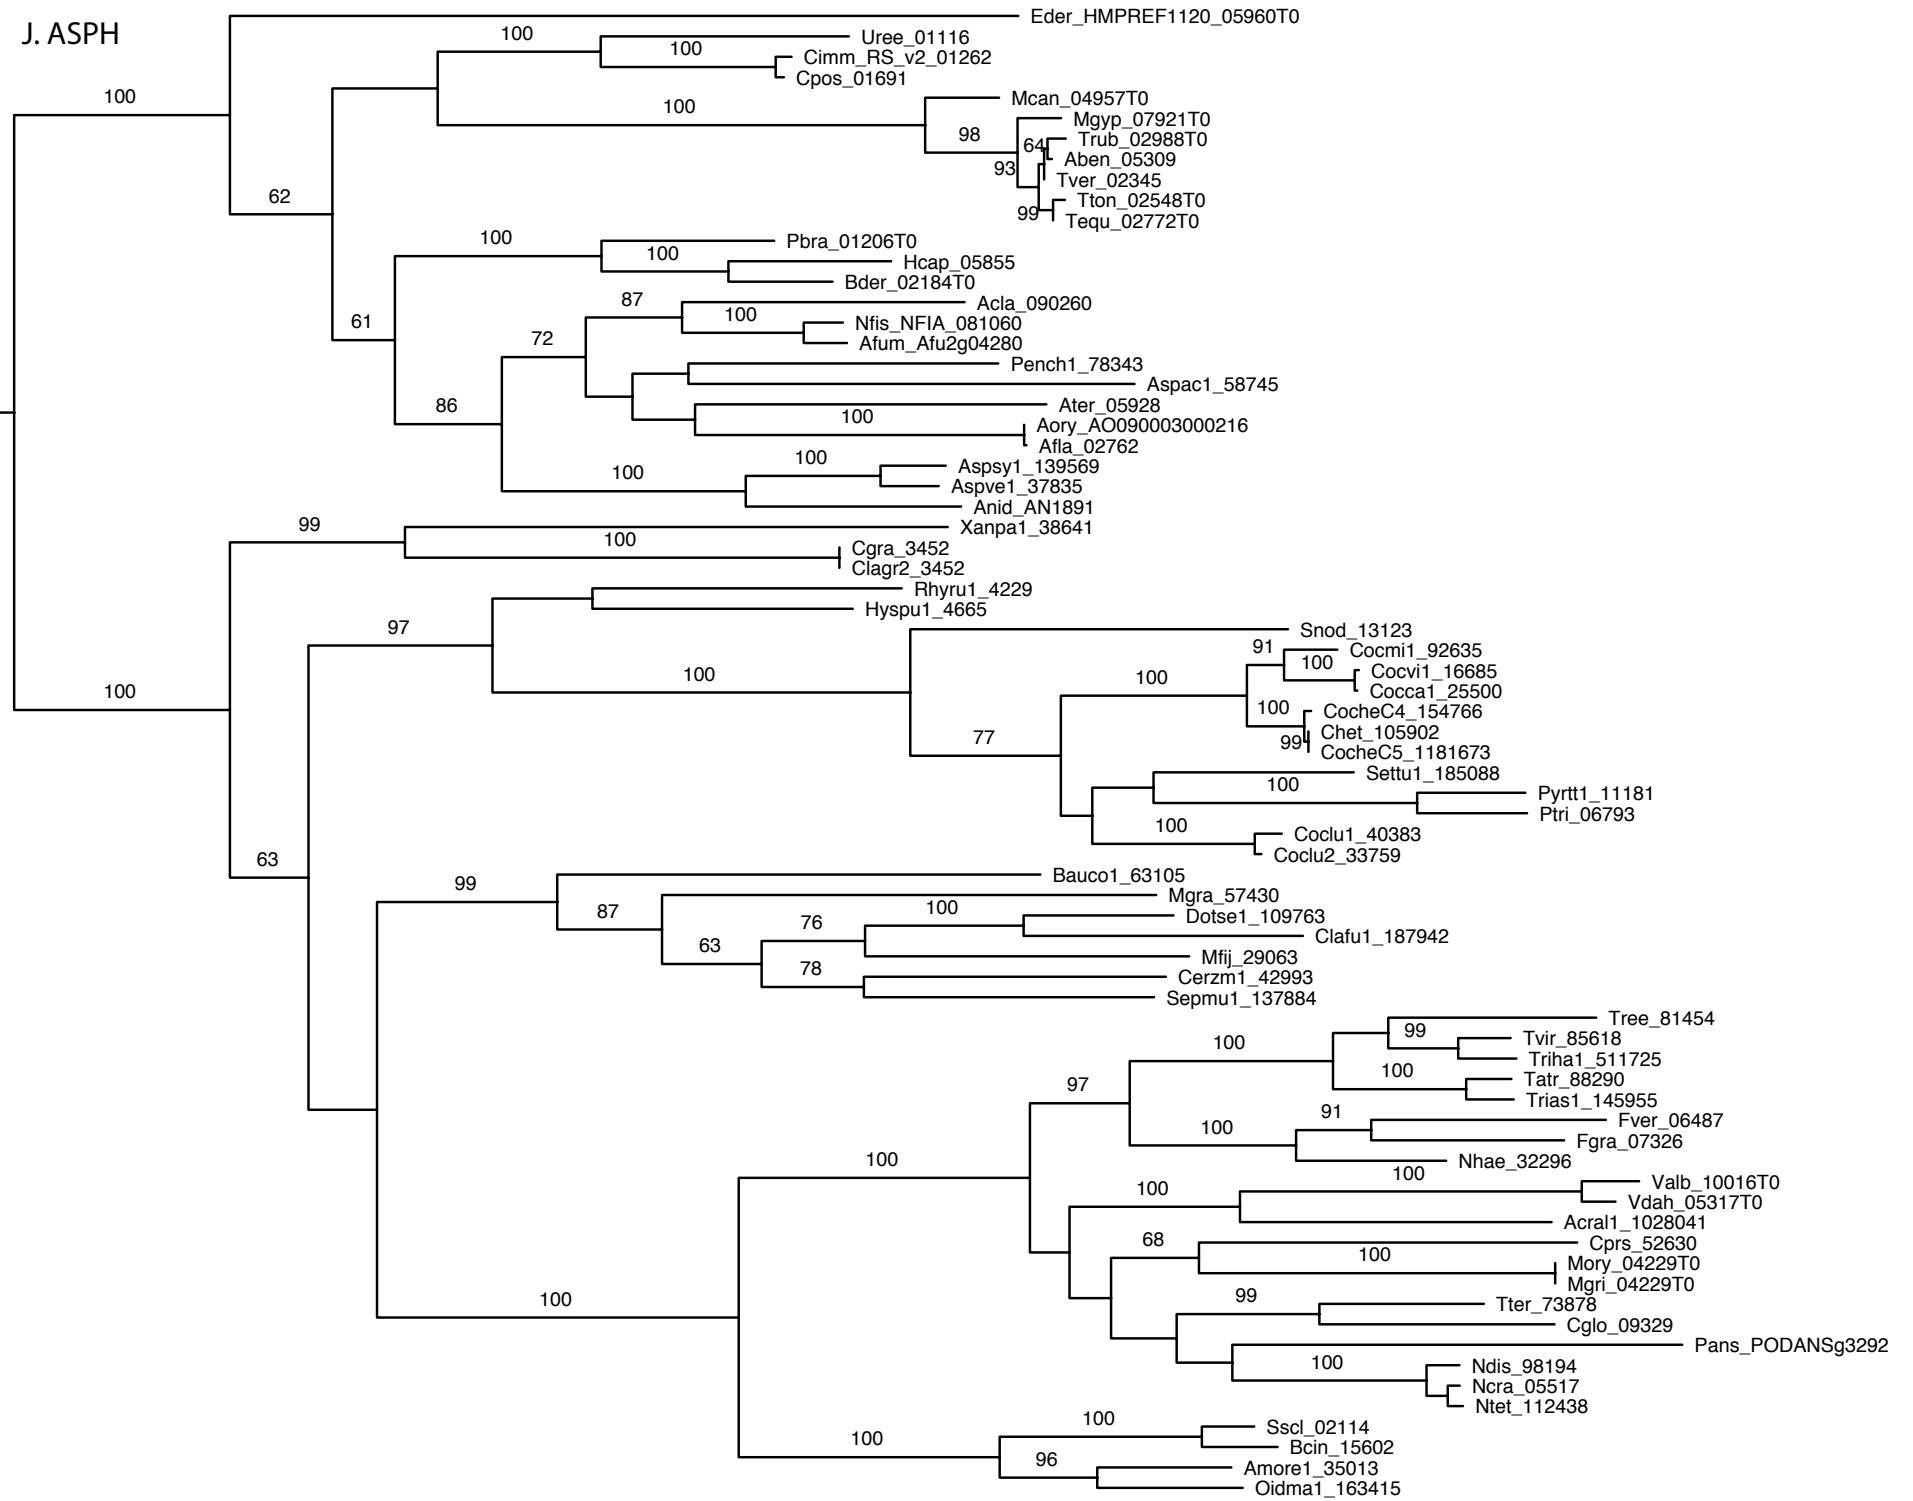

K. MFSG

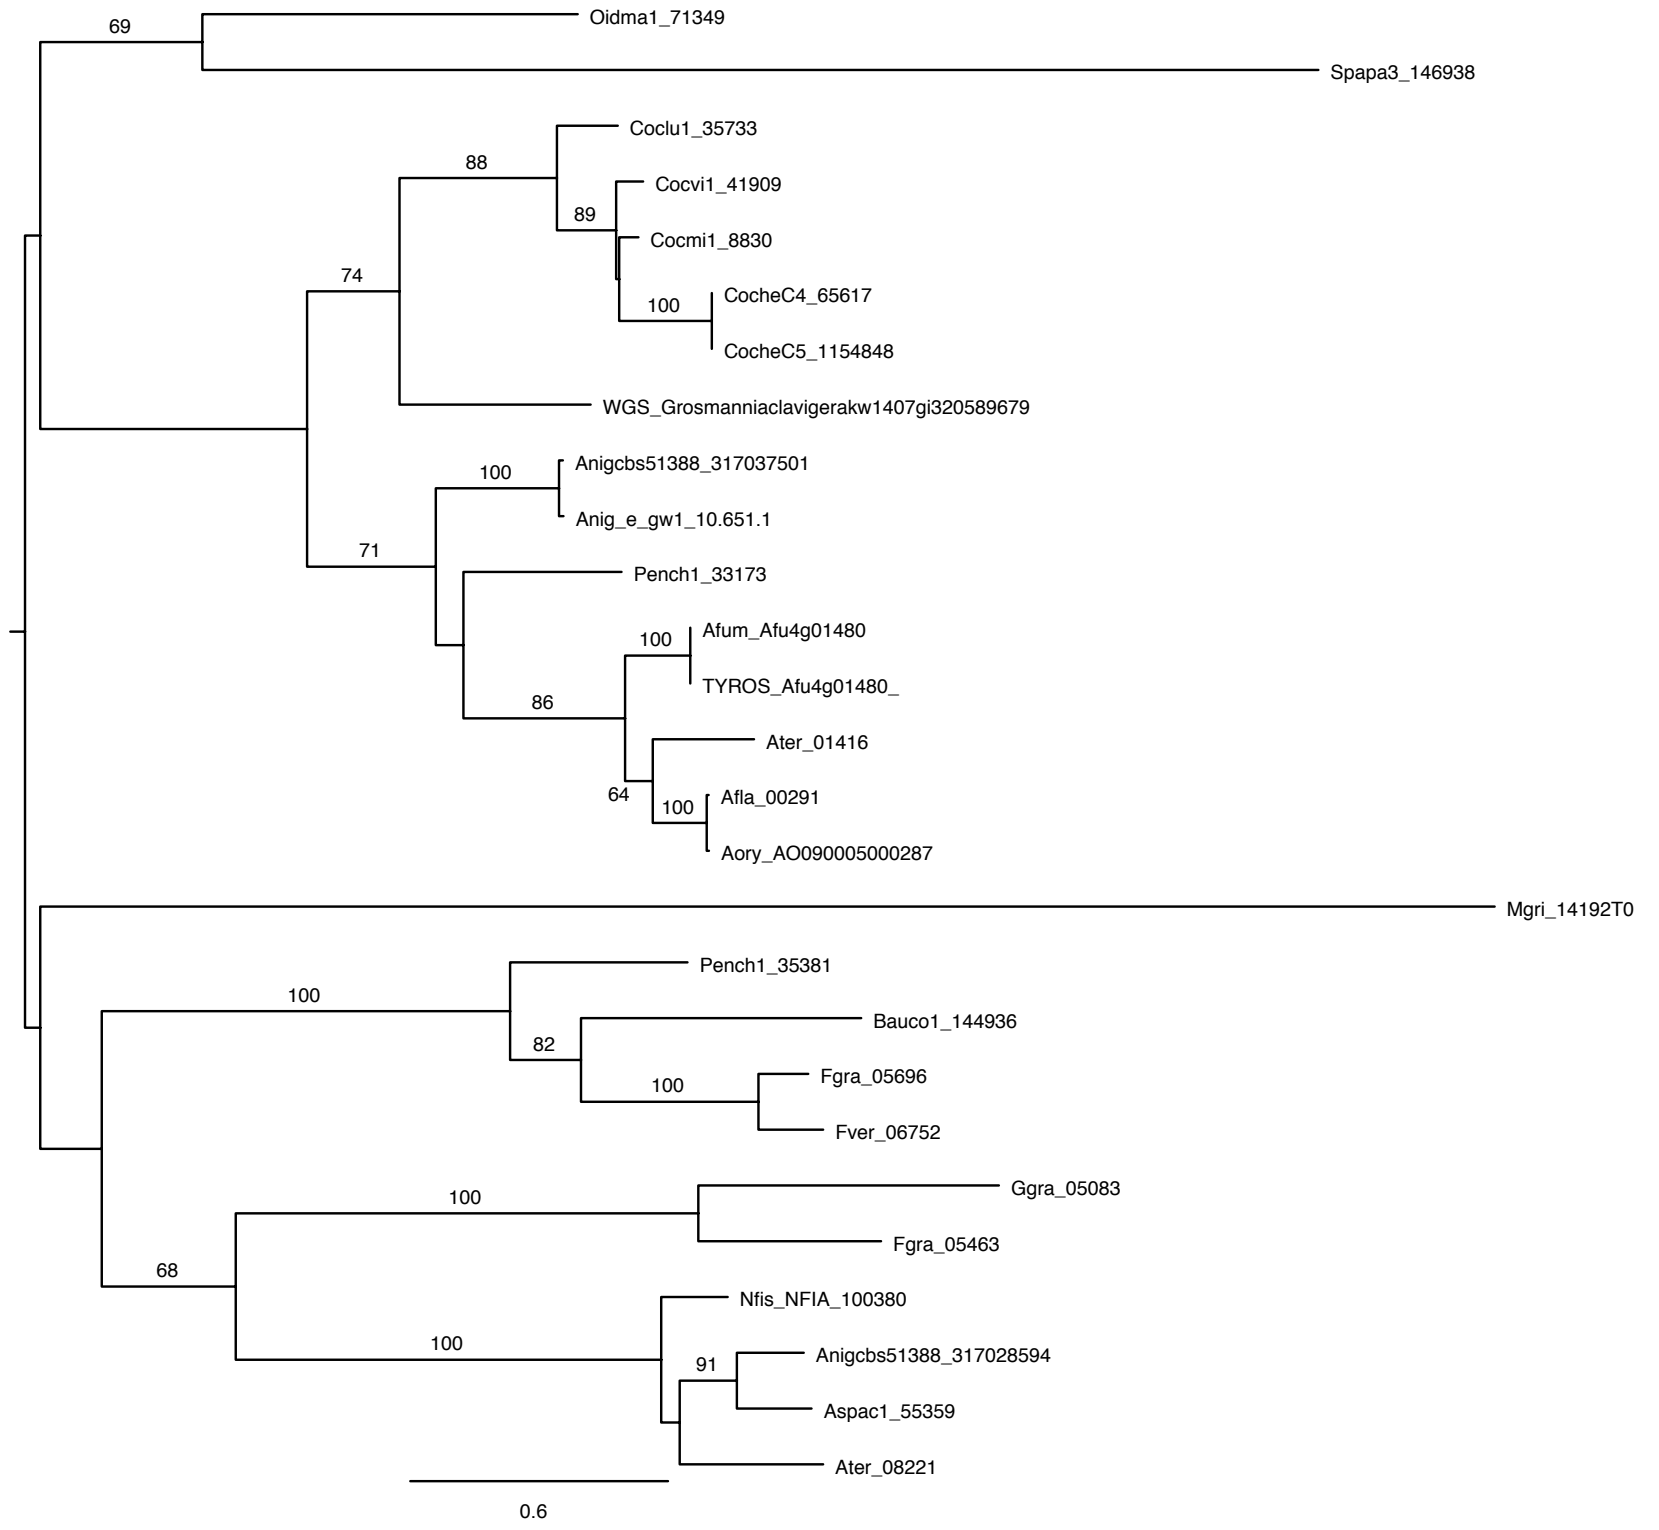

L. FPHG

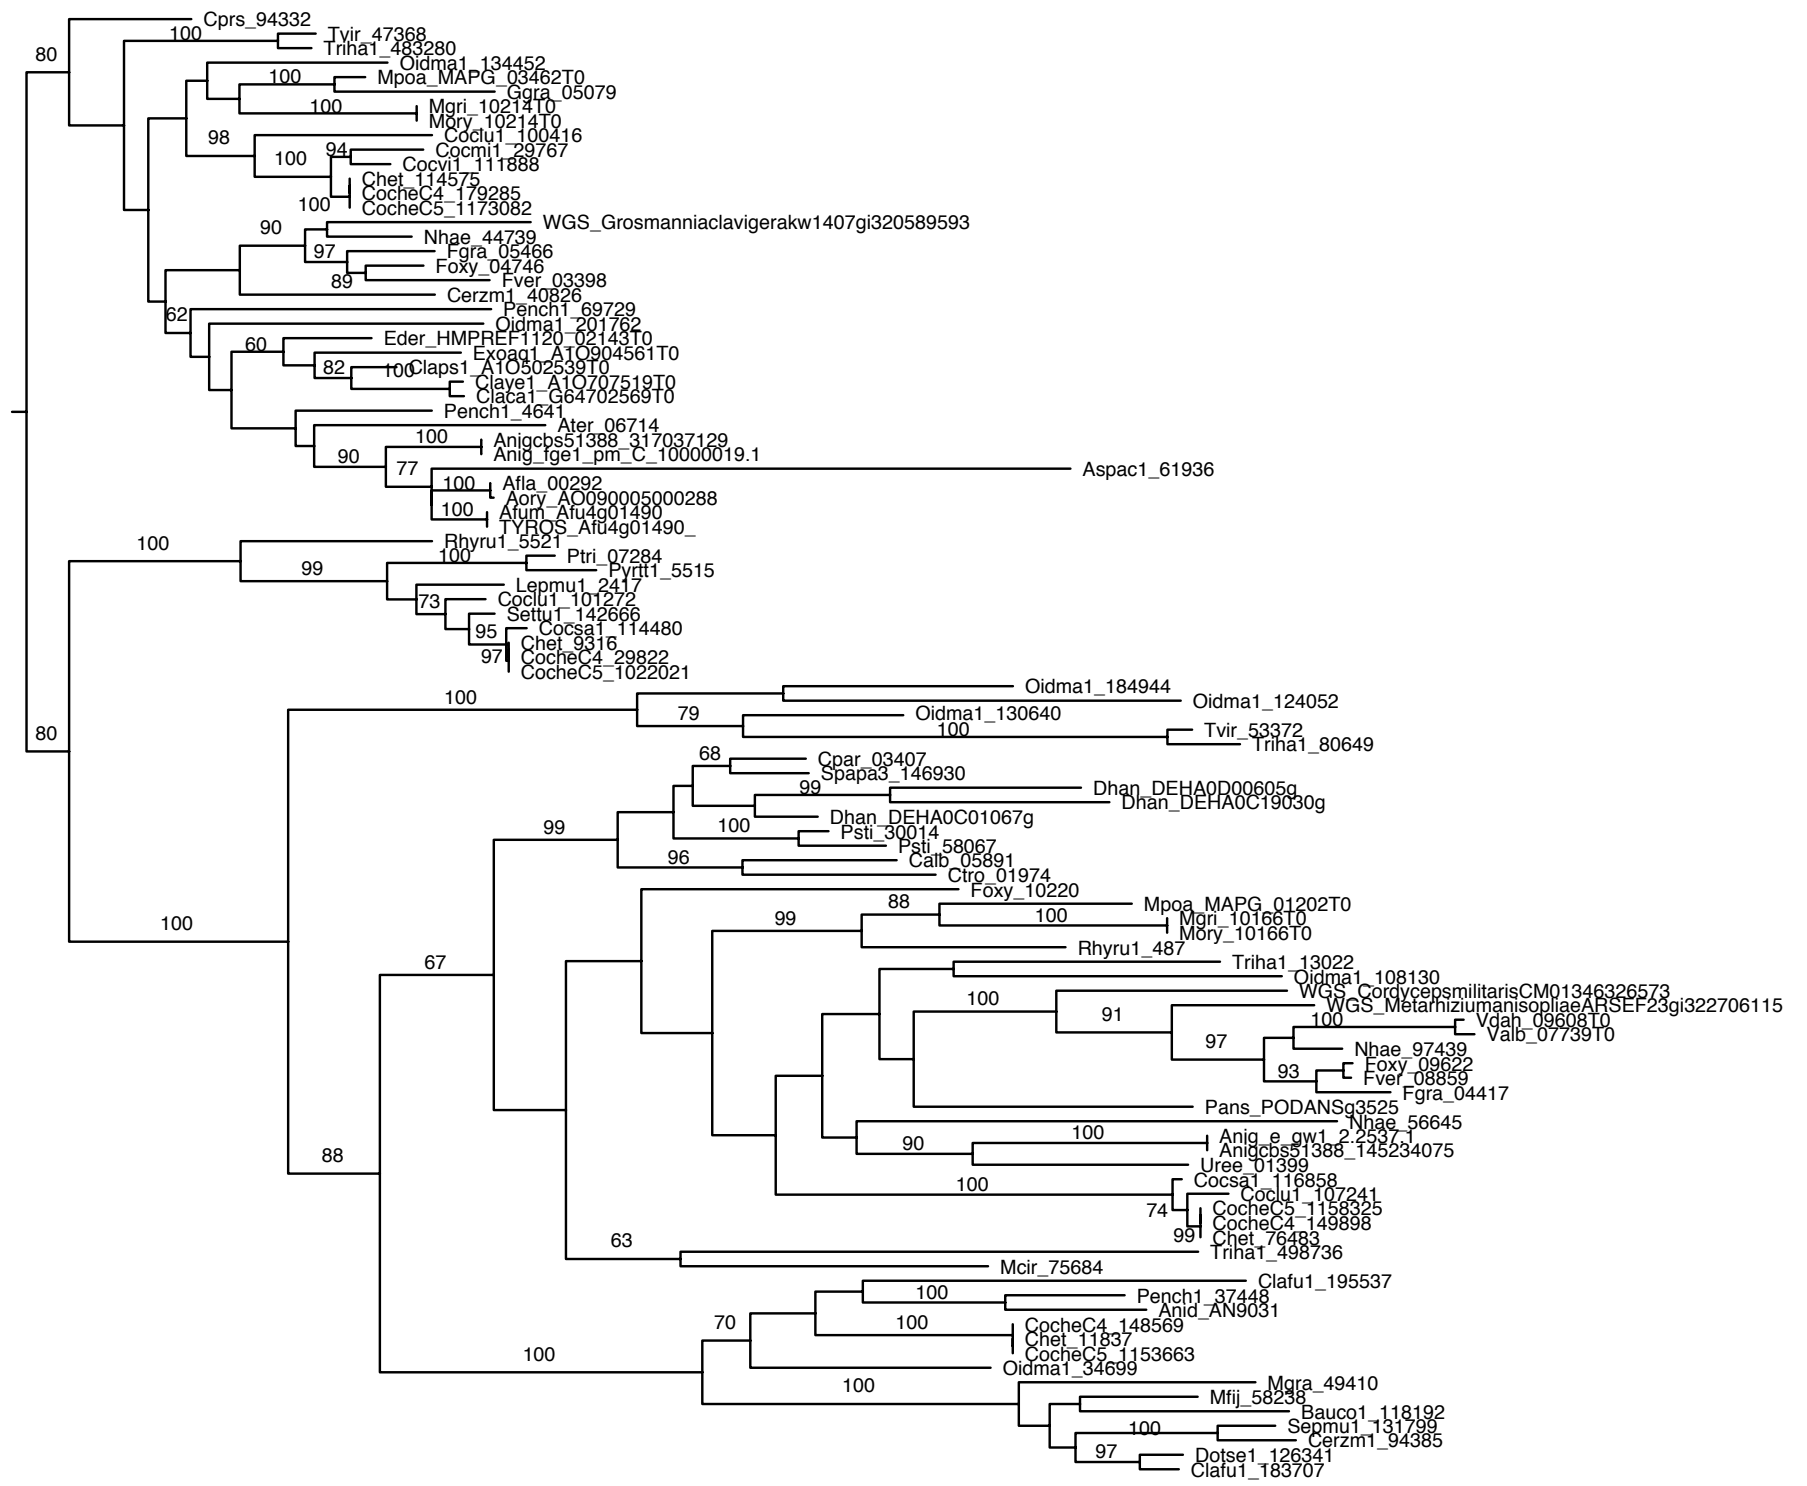

0.2

M. SDOG

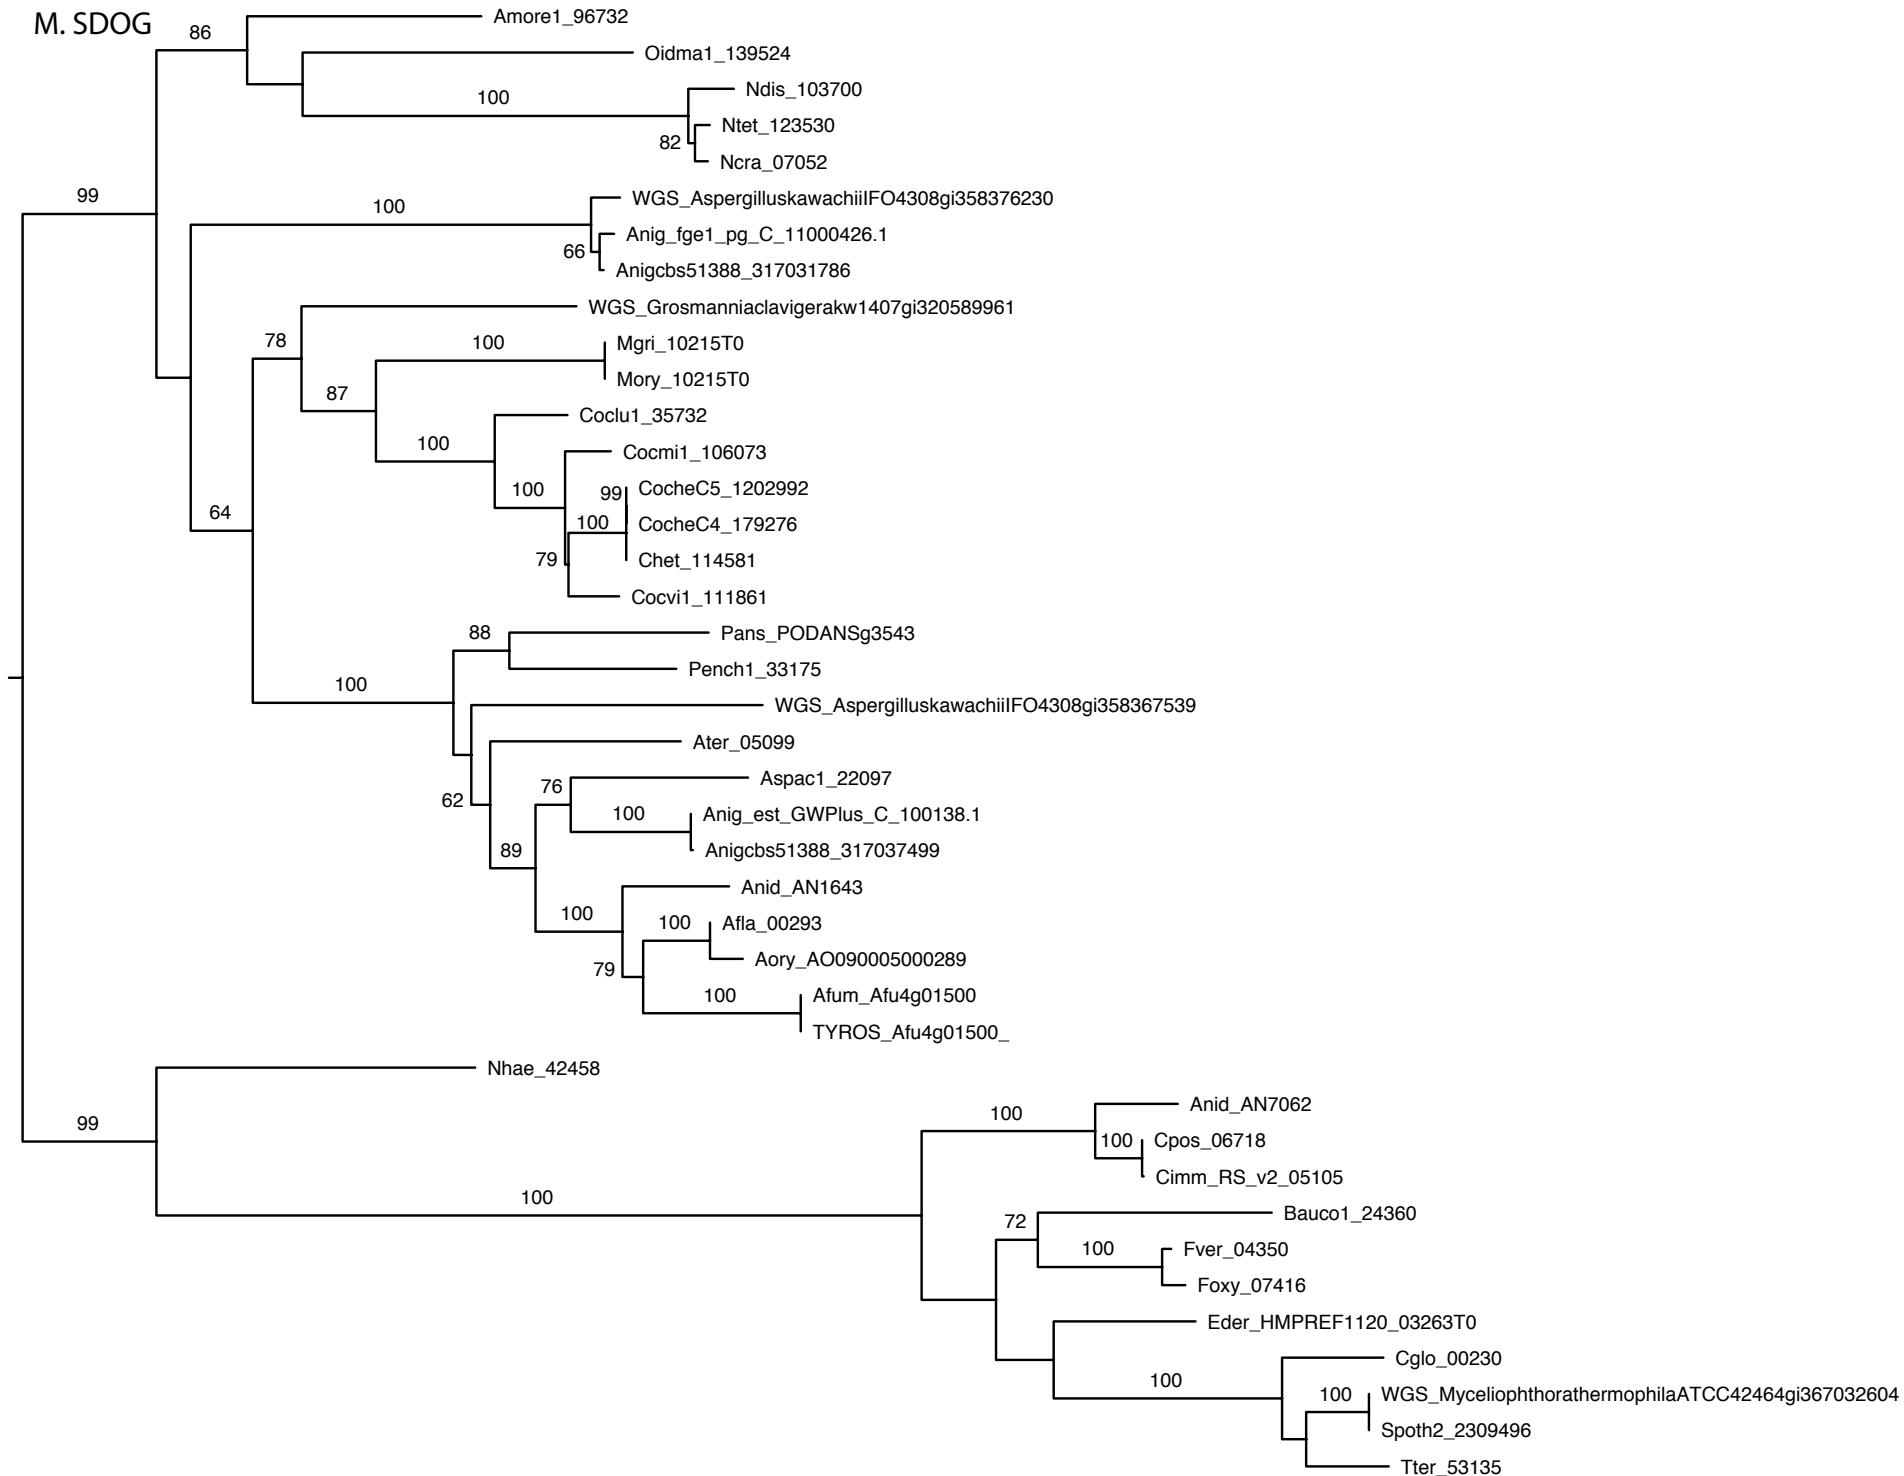

0.3

N. CTFG

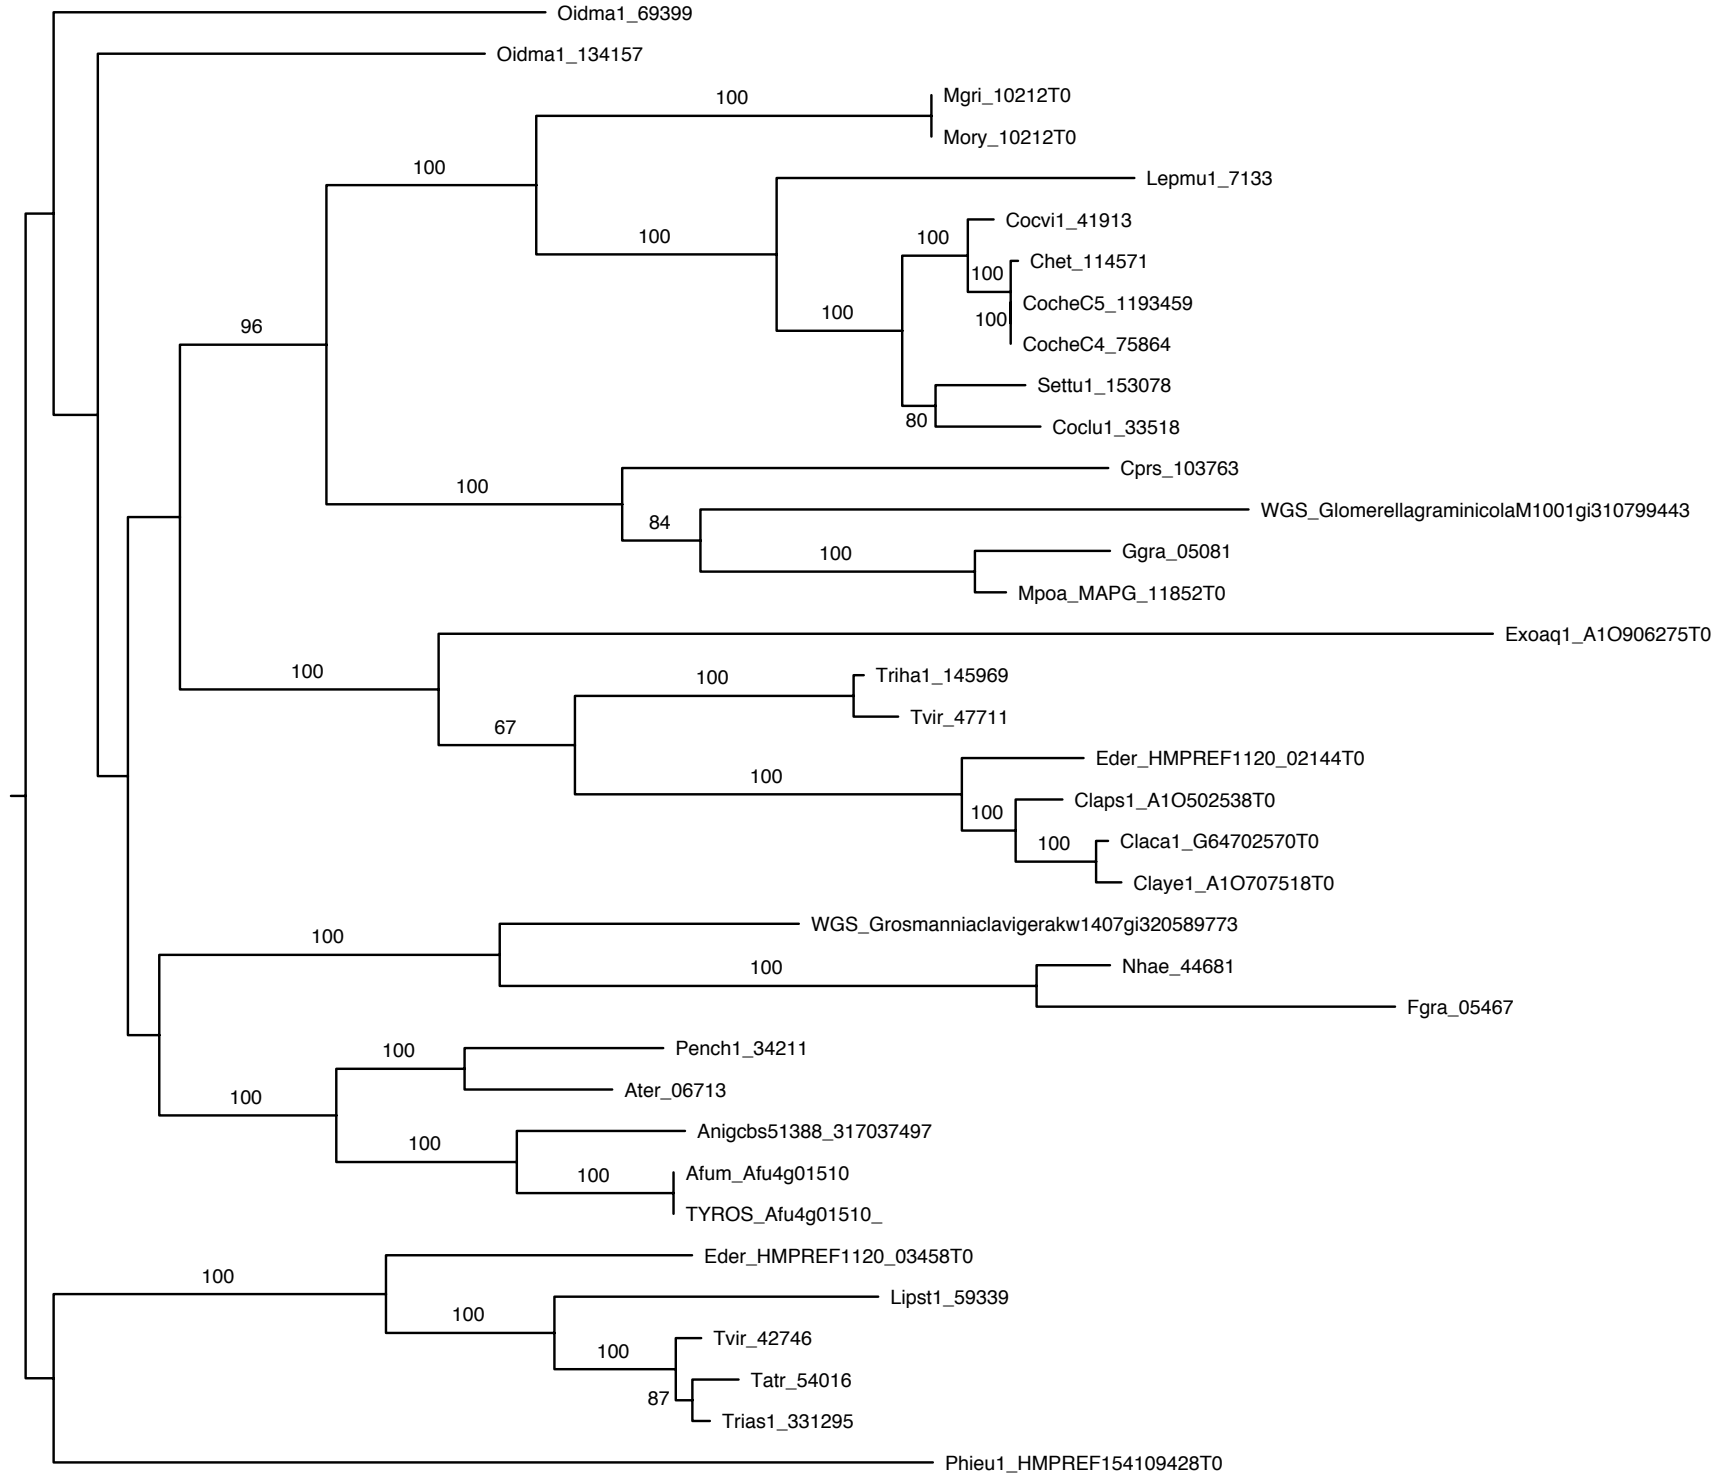

0.4



O. GDOG

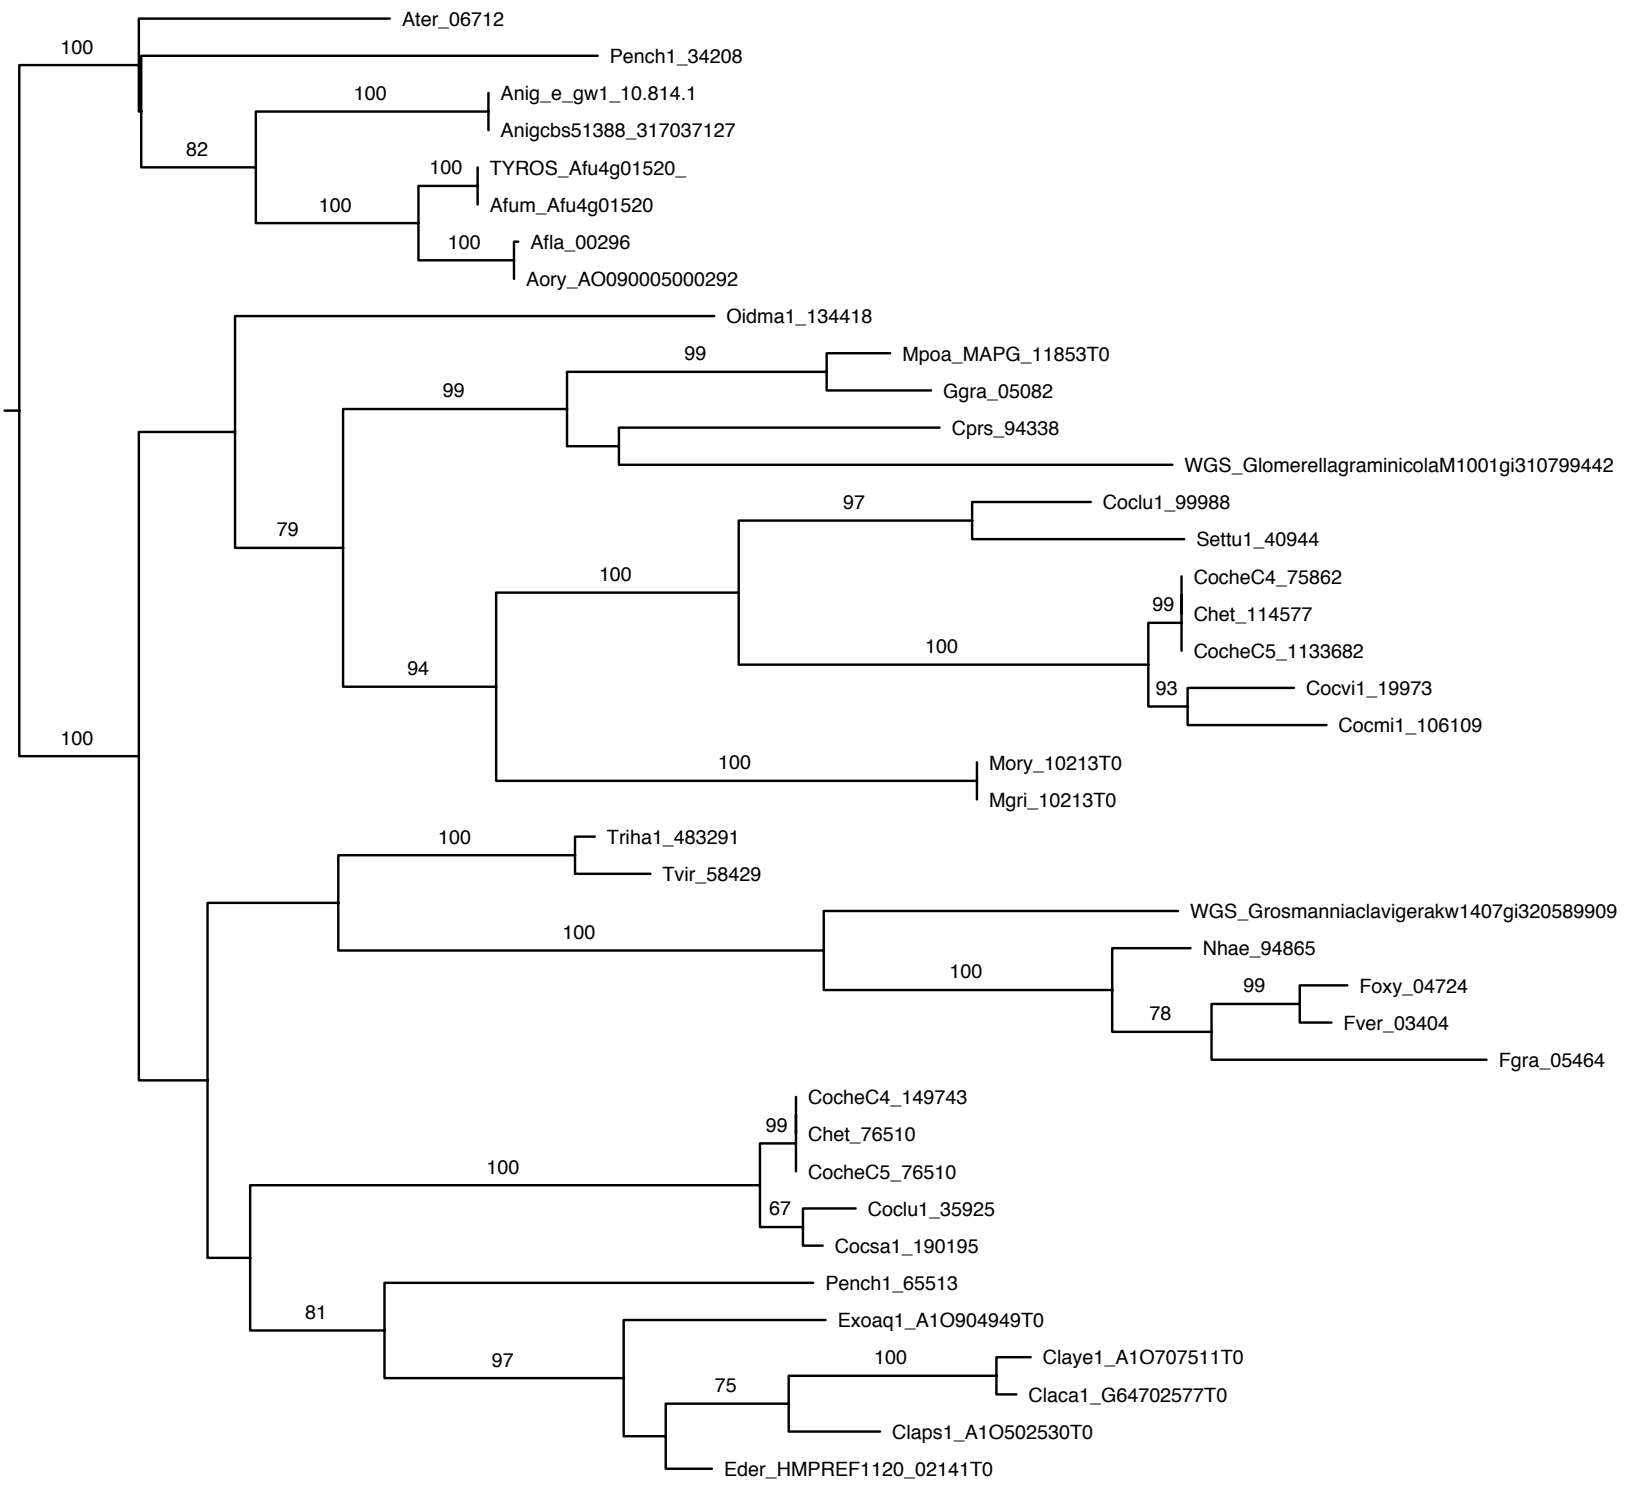

0.2

P. SAHG

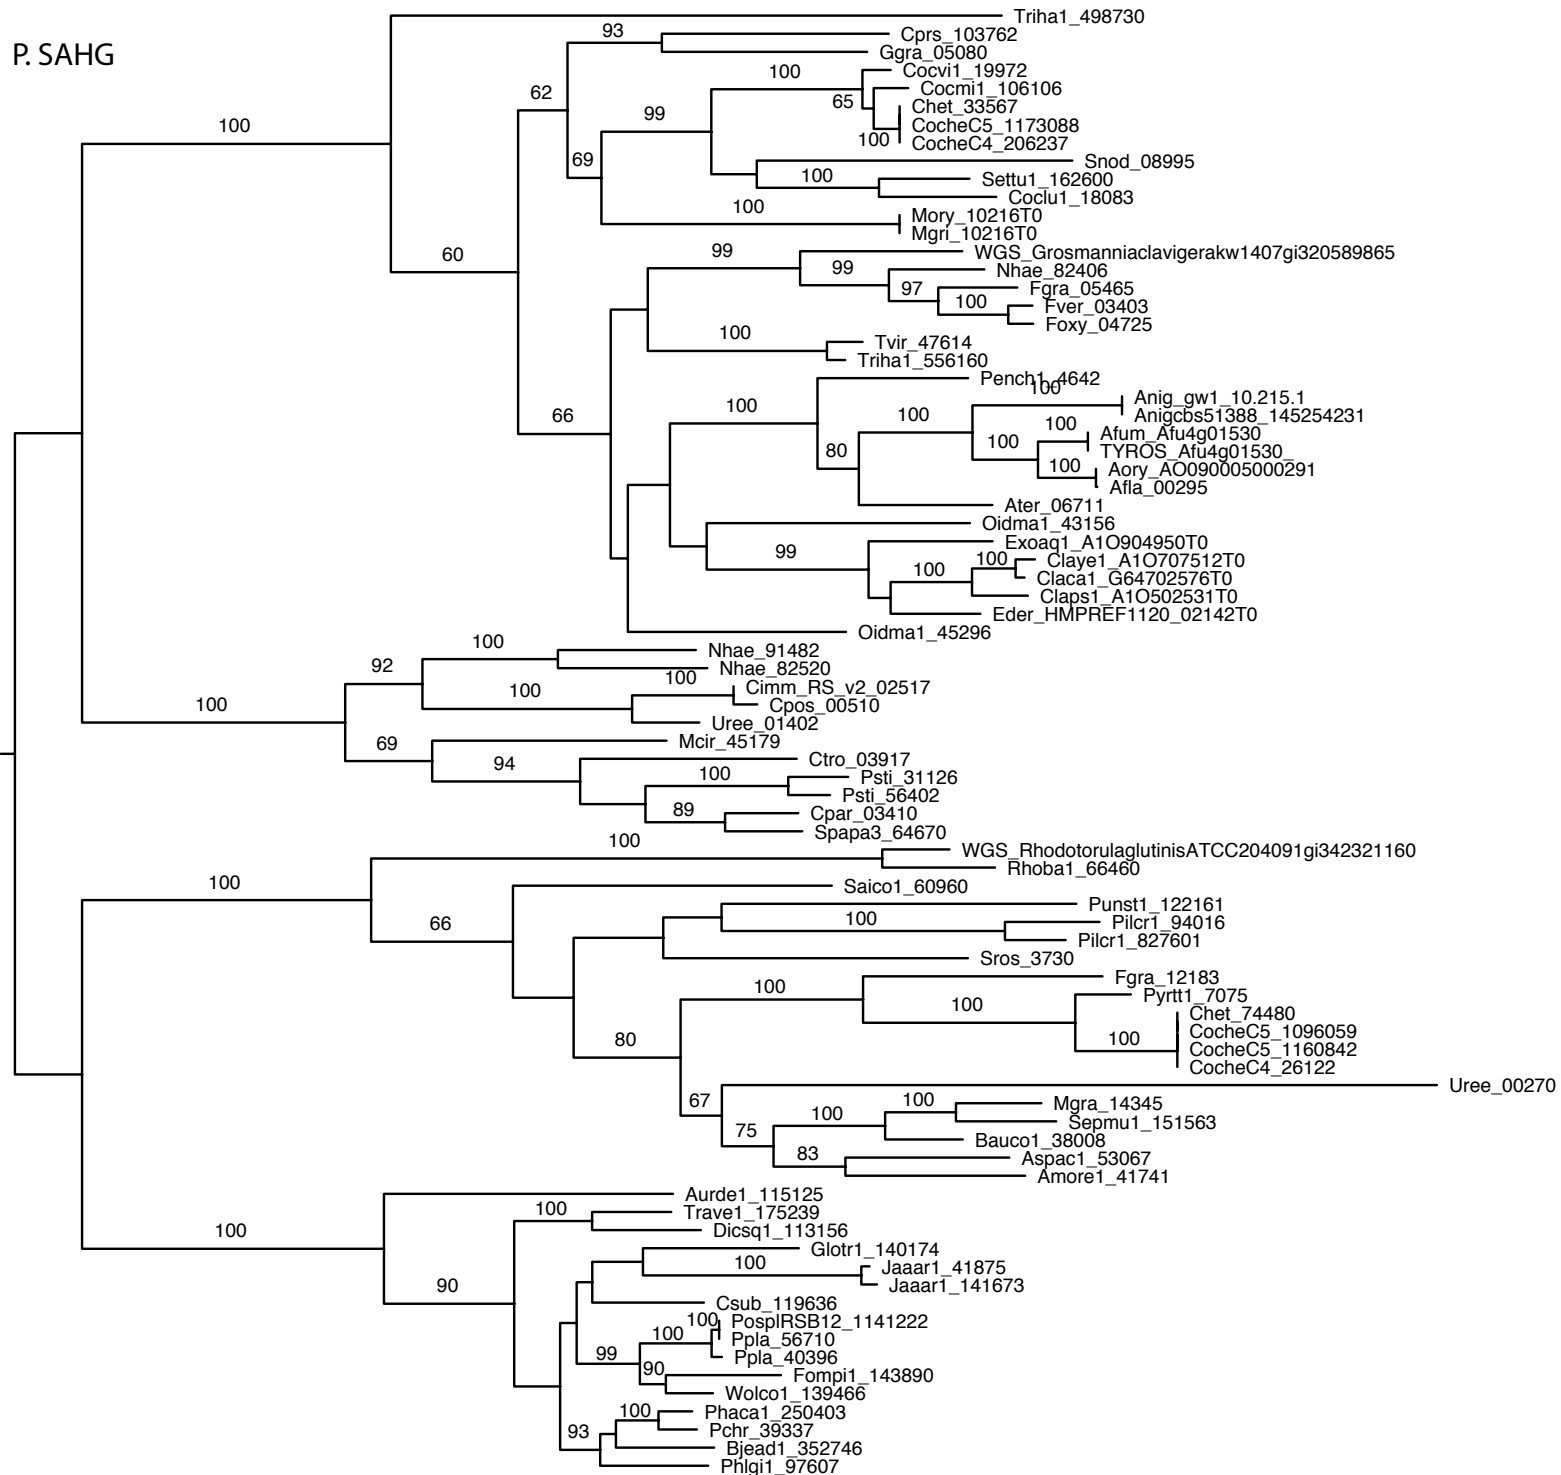

0.4

Q. ADHG

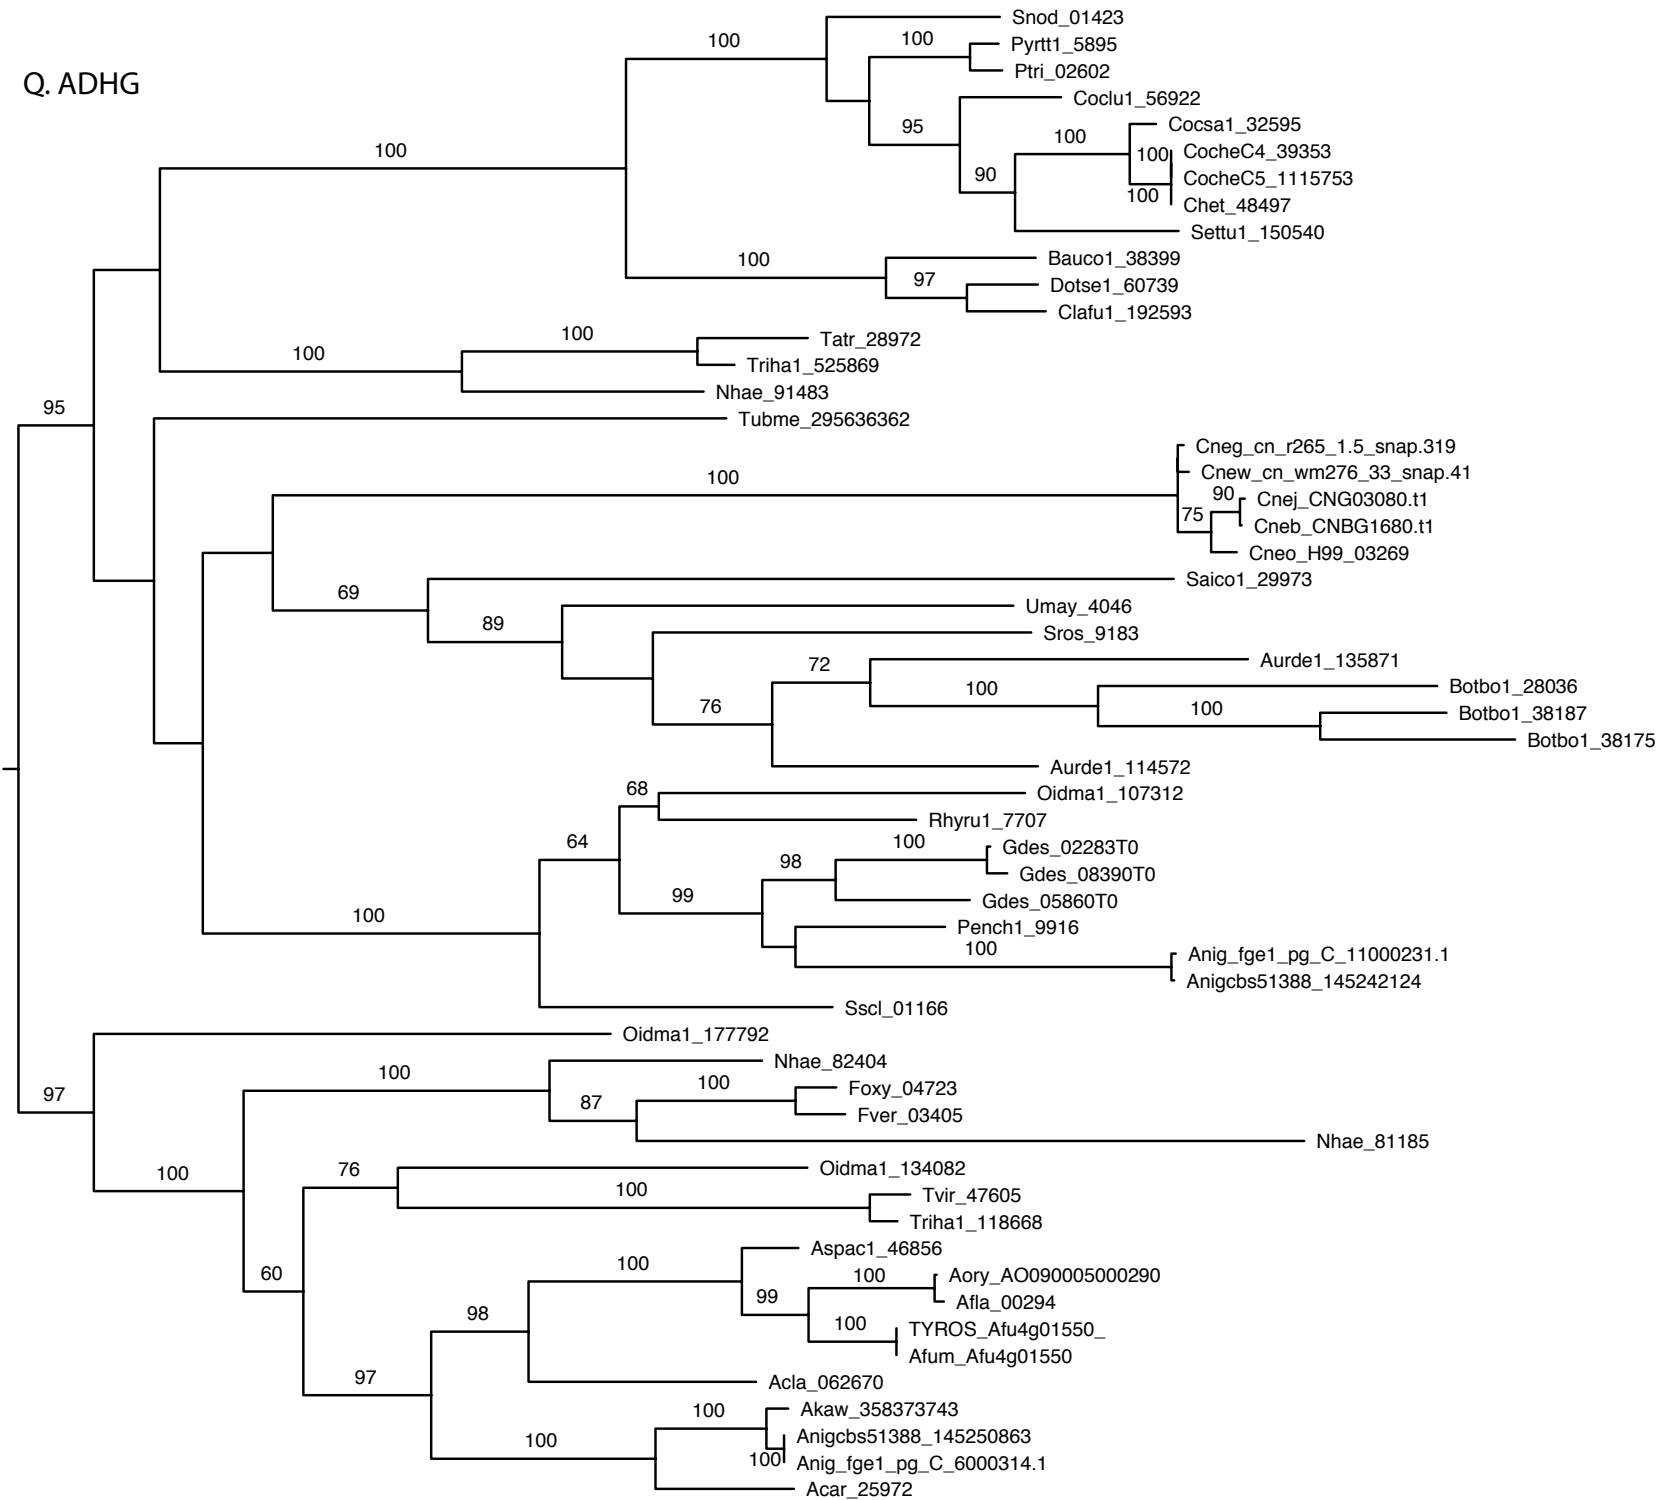

0.3

R. MFSH

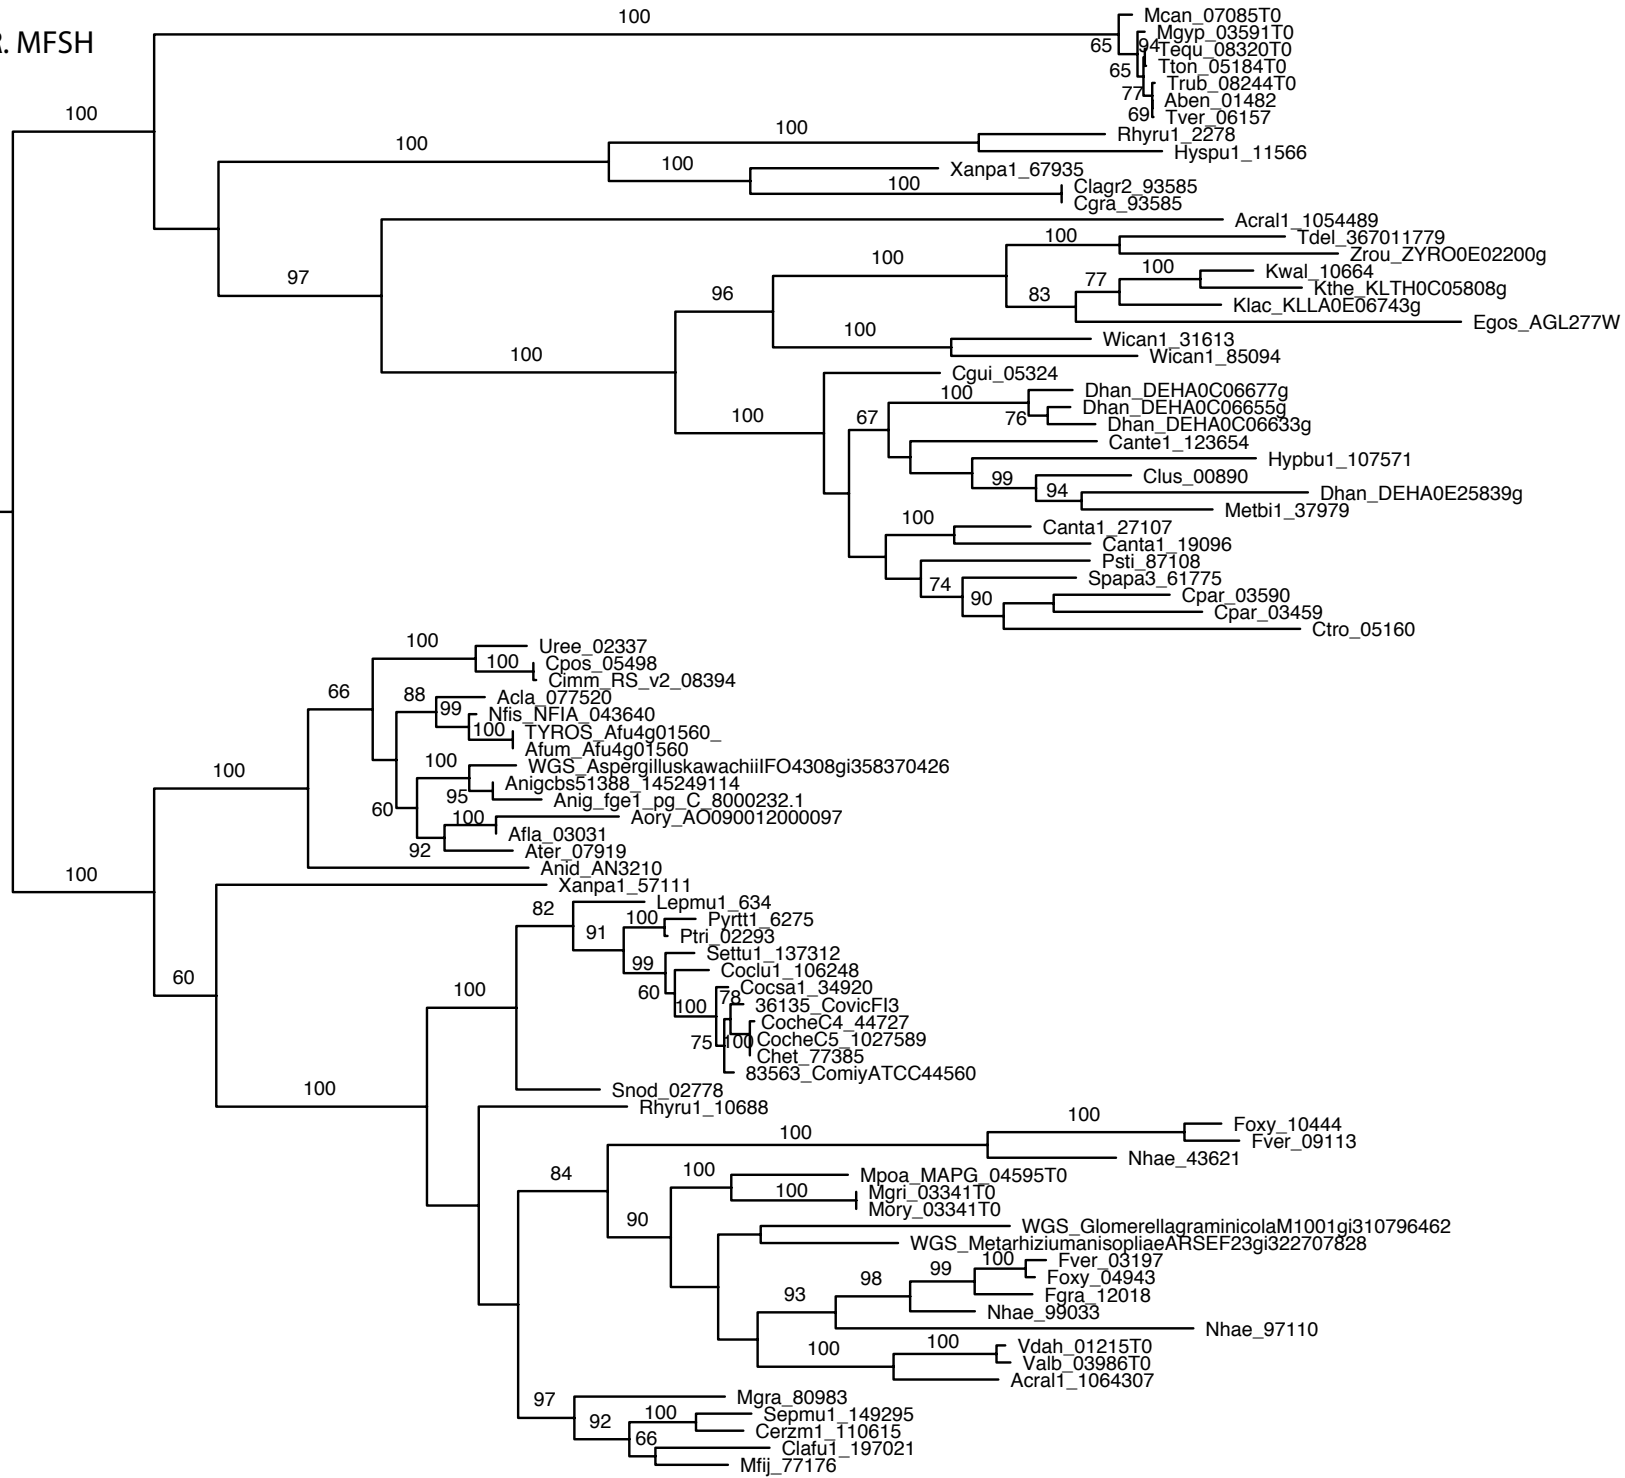

0.4

S. MFSBX

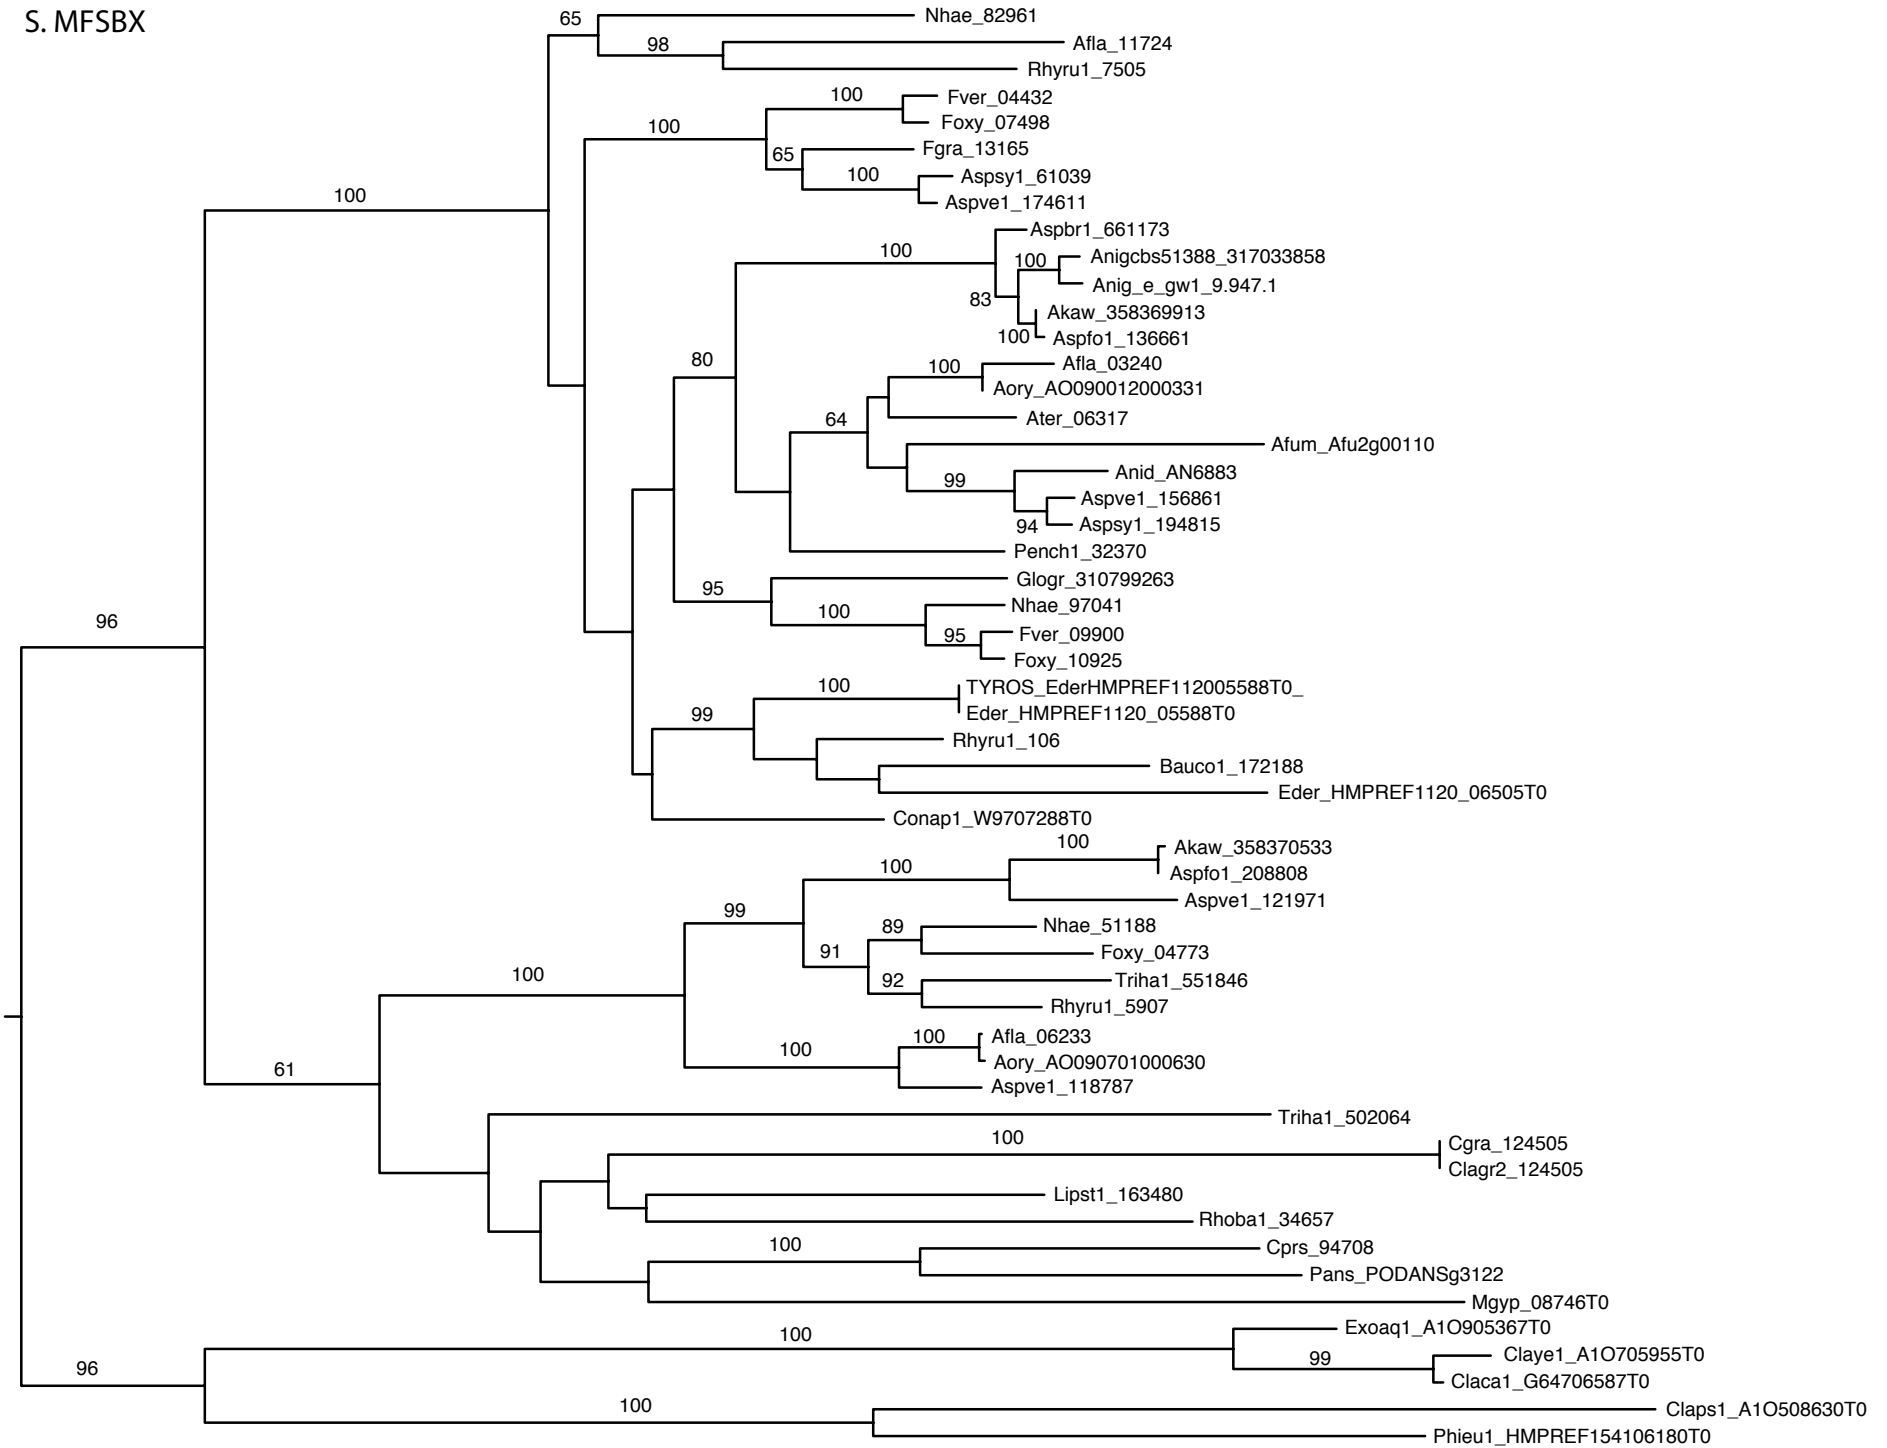

0.4

T.ICLBX

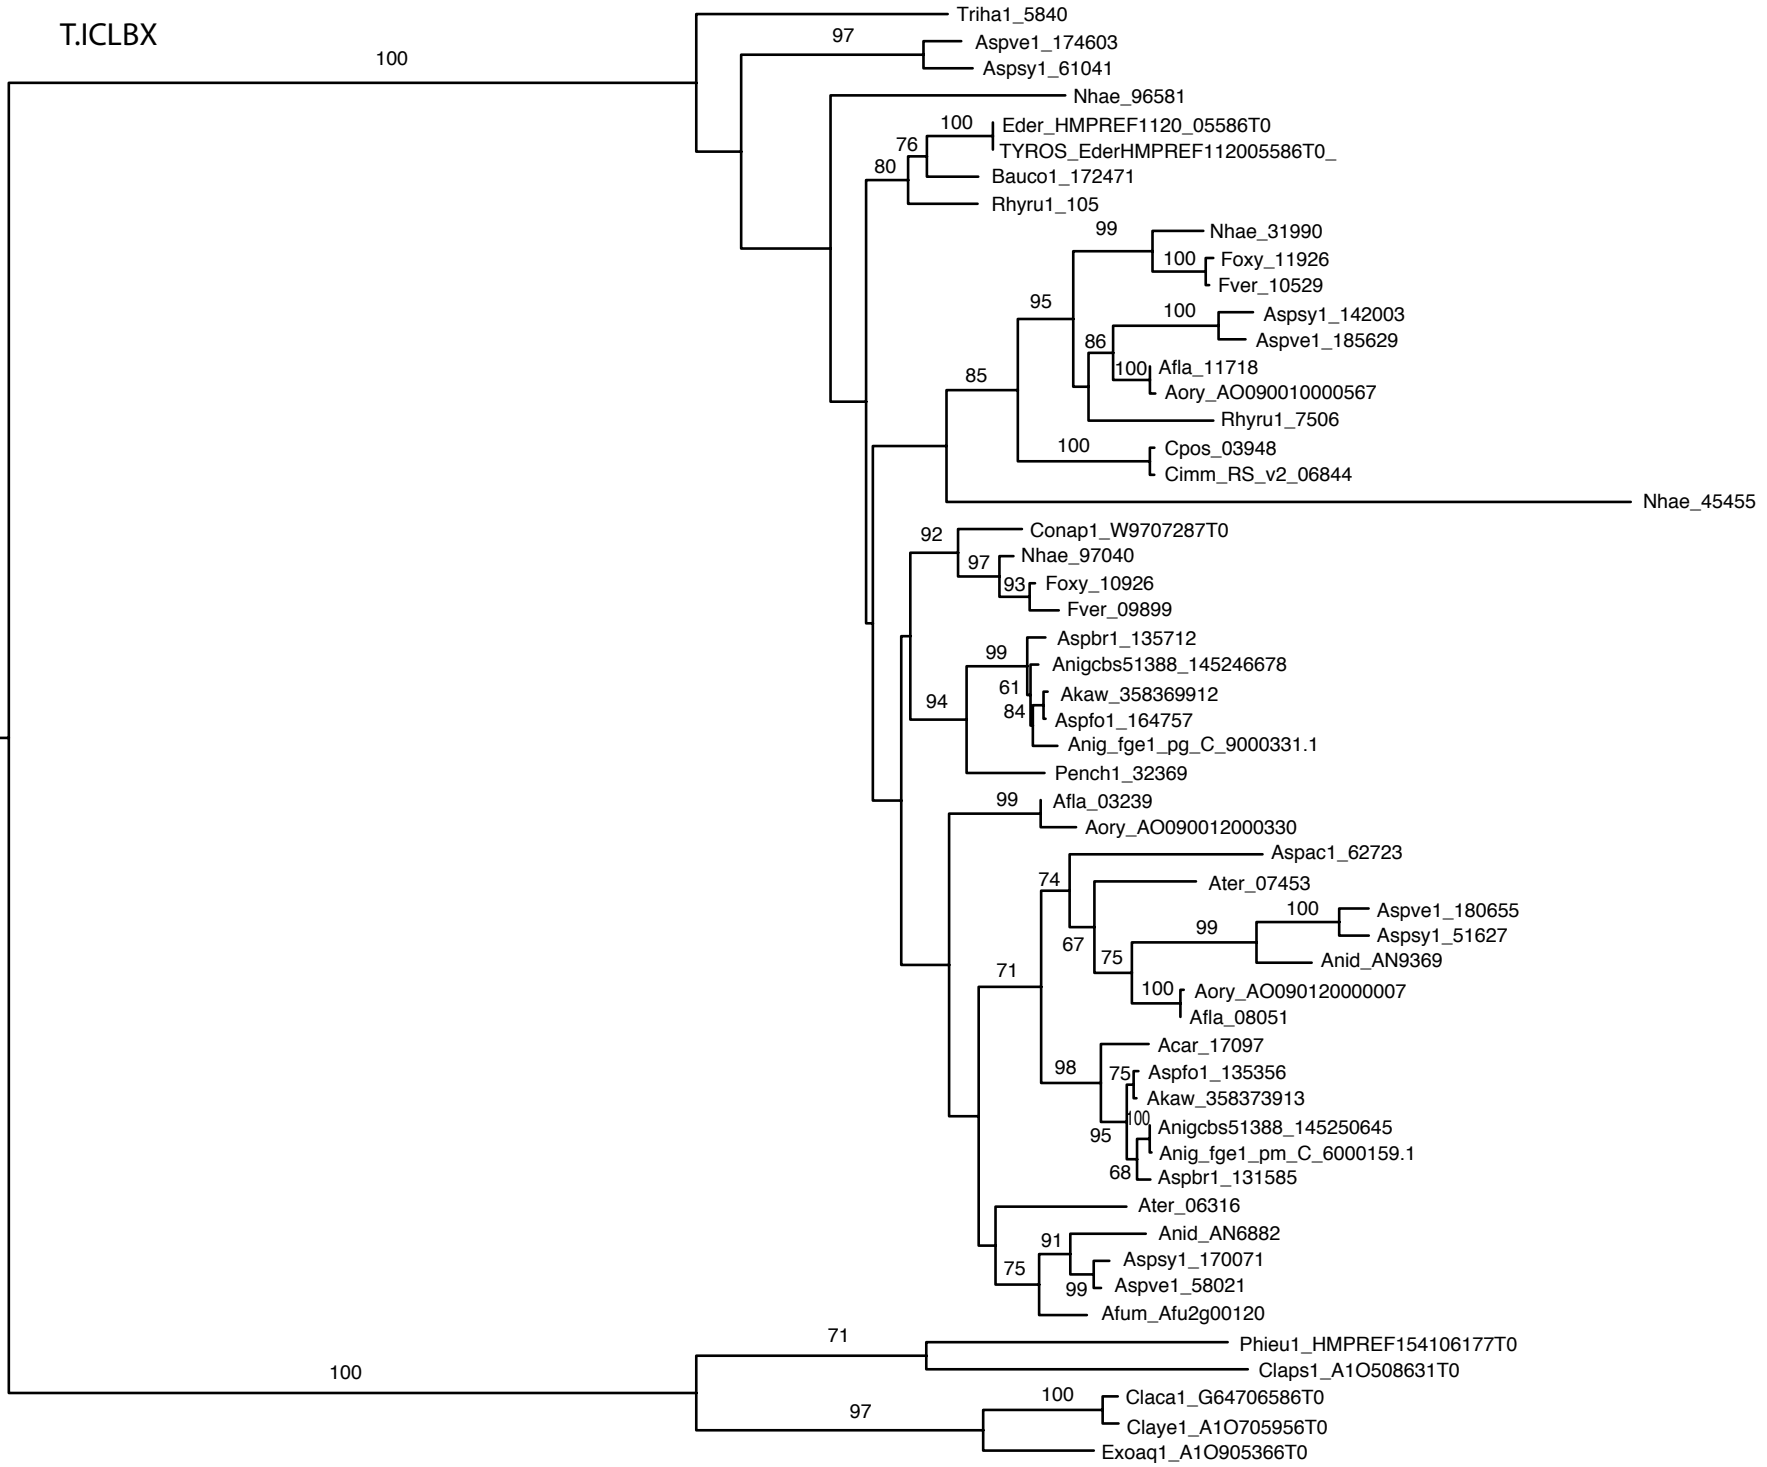

0.5

U. RPB2

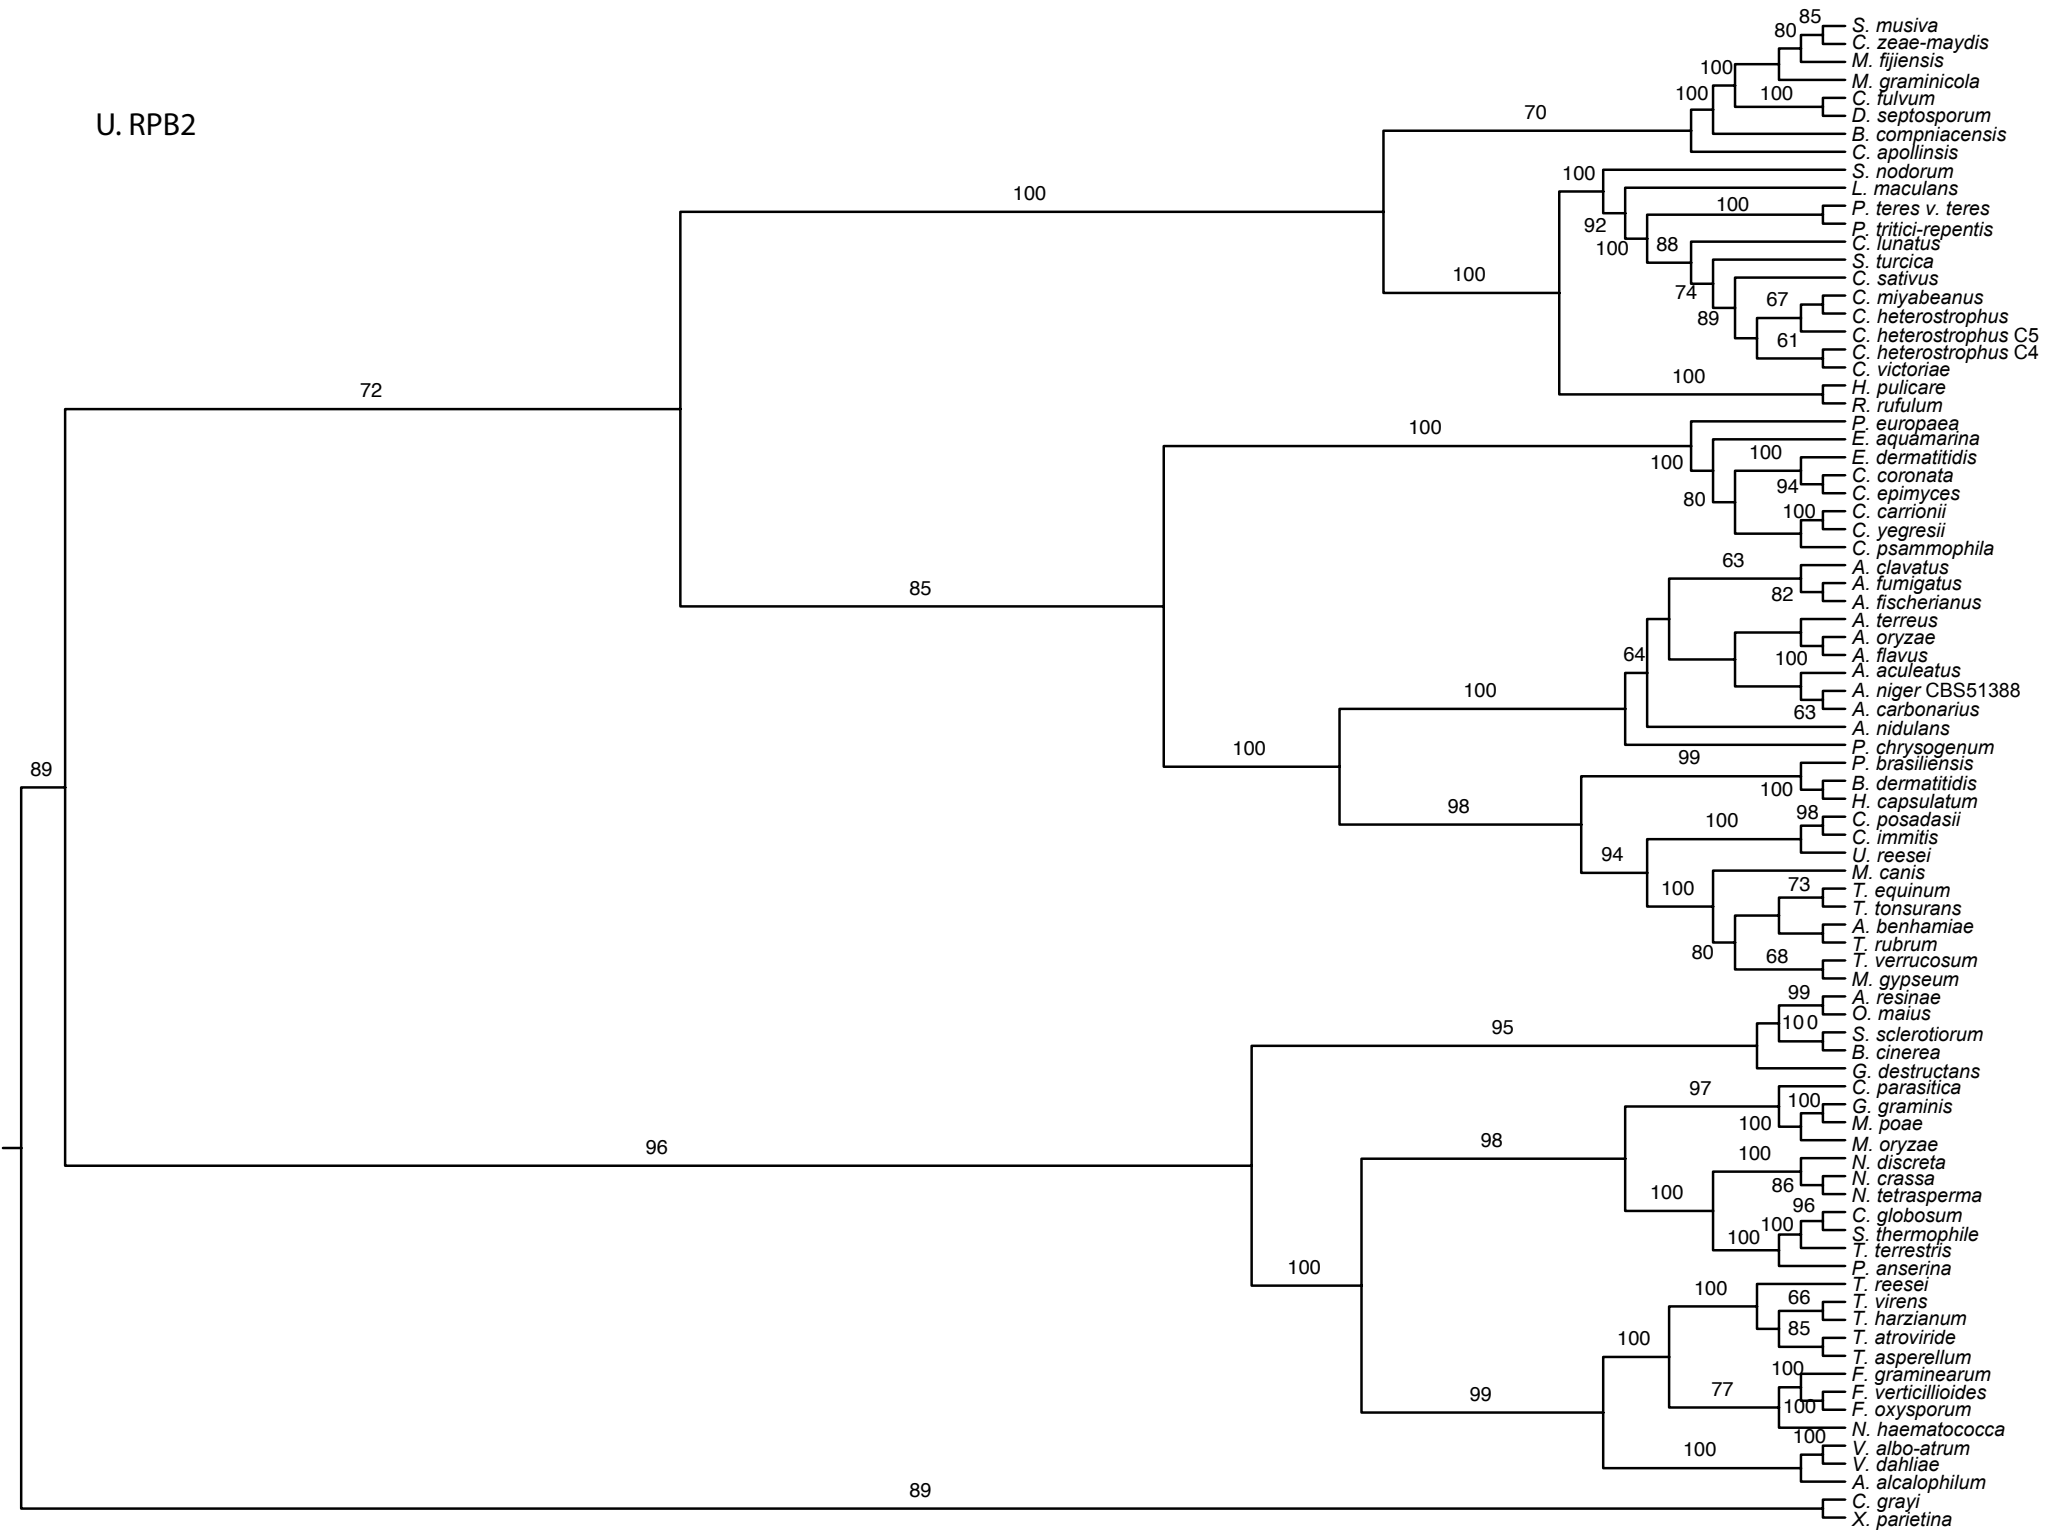

## *O. maius*

Primary cluster

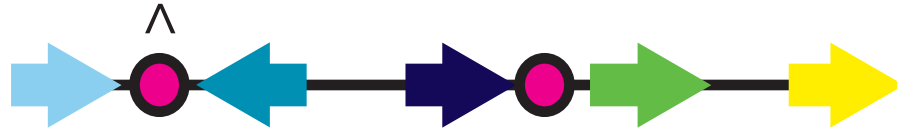

Scaffold 18: 884379-899328

Paralogous cluster

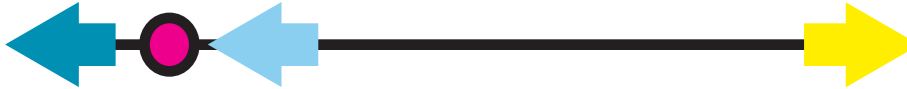

Scaffold 10: 892601-901355

## *E. dermatitidis*

Primary cluster

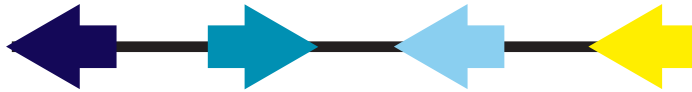

Supercontig 2: 1744551-1753834

Paralogous cluster 1

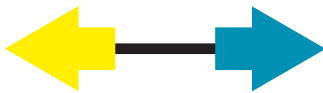

Supercontig 3: 1256091-1264197

Paralogous cluster 2

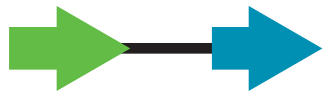

Supercontig 3: 727274-732304

### Gentisate Catabolism Clusters

- MFS myo-inositol transporter, putative (*mfsh*)
- aldehyde dehydrogenase (*adhG*)
- salicylate hydroxylase (*sahG*)
- gentisate 1,2-dioxygenase oxidoreductase (*gdoG*)
- C6 transcription factor (*ctfG*)
- stilbene-alpha-beta-dioxygenase (*sdoG*)
- fumarylpyruvate hydrolase (*fphG*)
- MFS sugar transporter, putative (*mfsg*)



### A. Bacterial gentisate 1,2-dioxygenase alignment Logo

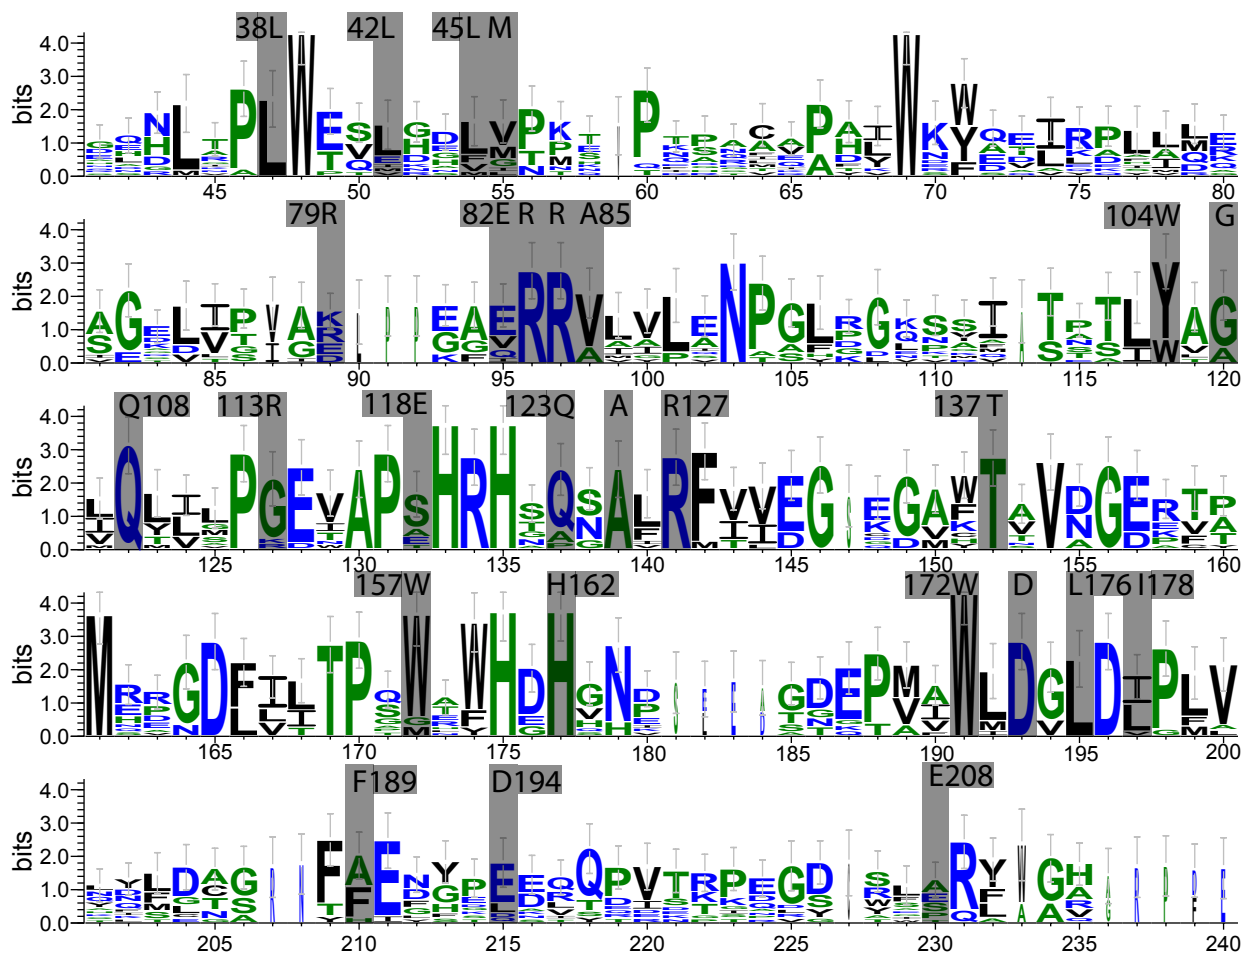

### B. Fungal gentisate 1,2-dioxygenase alignment Logo

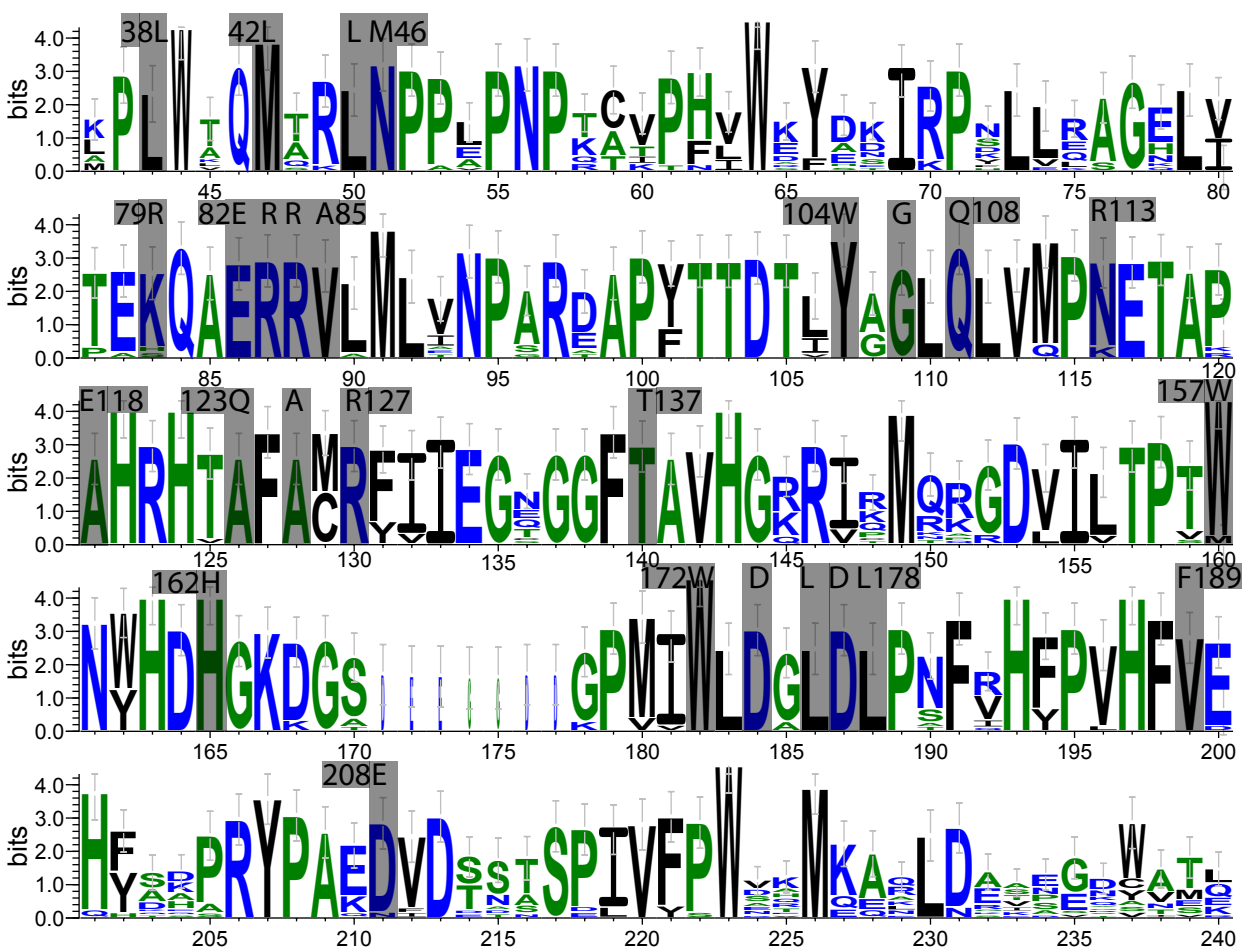

A

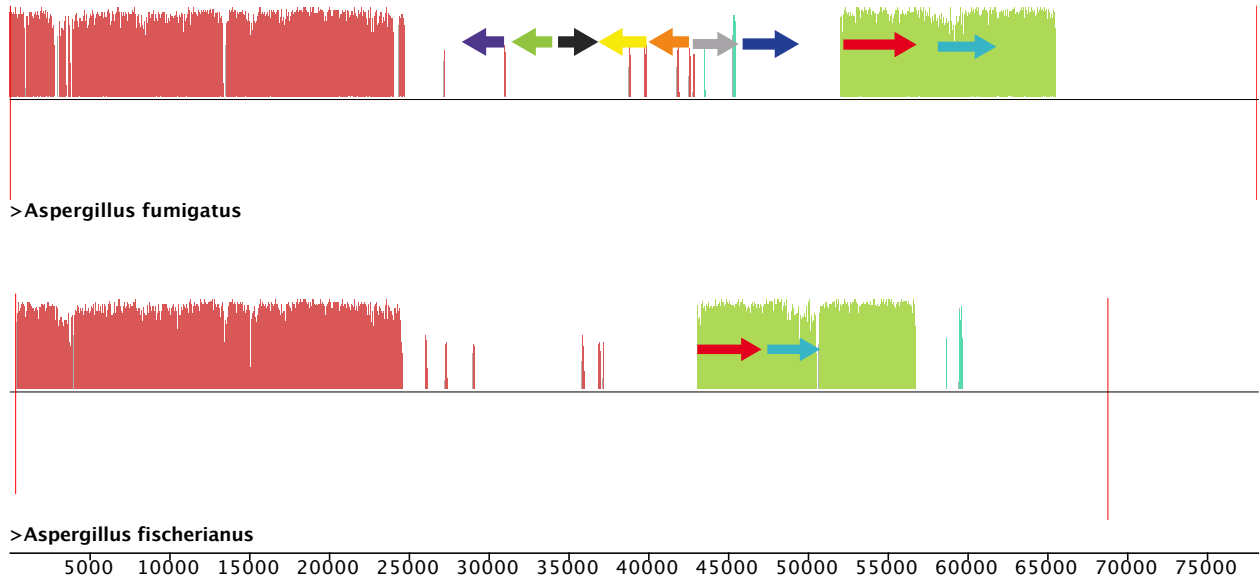

B

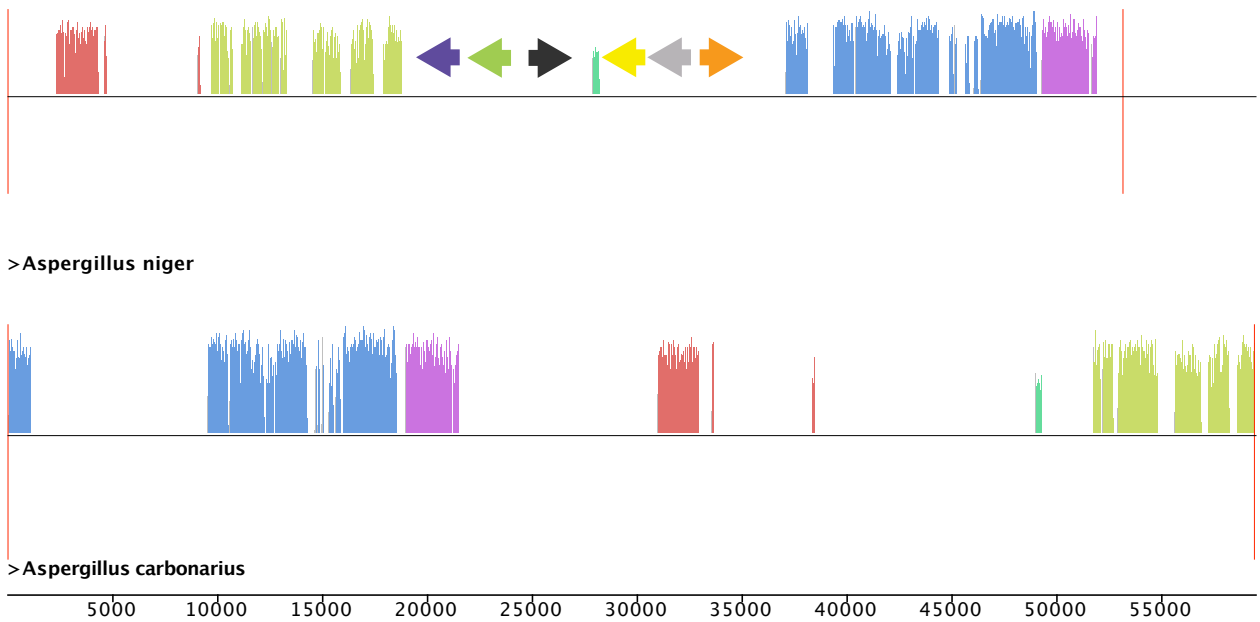

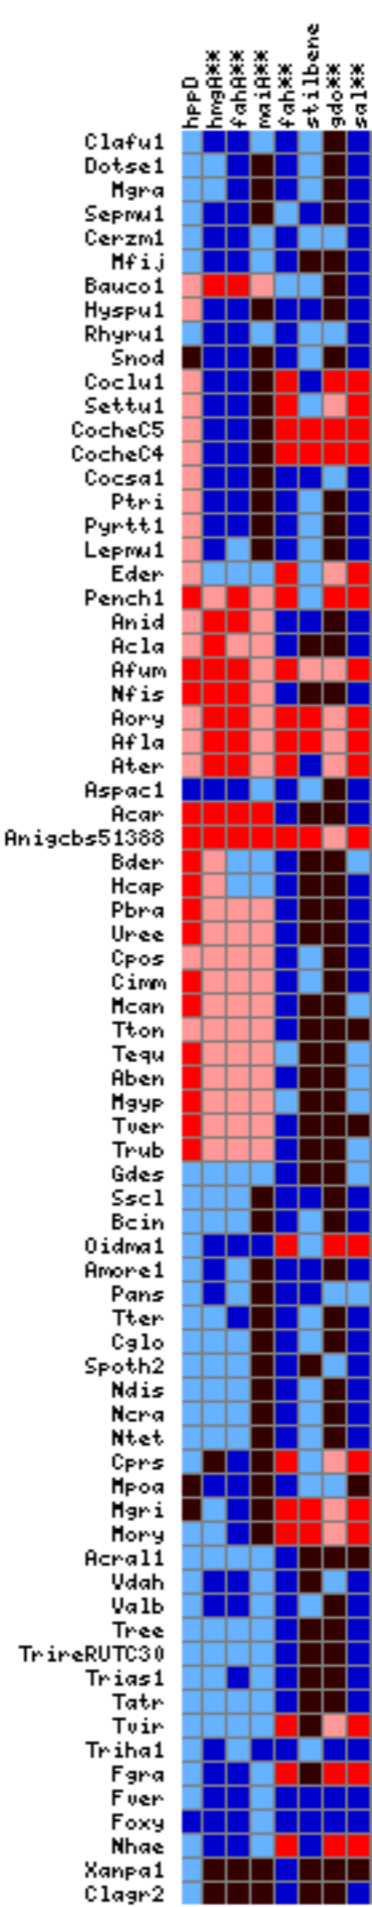

Table S1. Genomes analyzed in this study.

| <b>Genome</b>                       | <b>Genome Code</b> | <b>Ecology</b>                                            | <b>TD</b> | <b>GC<br/>+sdoG</b> | <b>GC<br/>-sdoG</b> |
|-------------------------------------|--------------------|-----------------------------------------------------------|-----------|---------------------|---------------------|
| <b>Genomes in Figure 2</b>          |                    |                                                           |           |                     |                     |
| Acremonium alcalophilum             | Acral1             | sludge of pig manure compost                              | -         | -                   | -                   |
| Amorphotheca resinae ATCC 22711     | Amore1             | jet fuel                                                  | -         | -                   | -                   |
| Arthroderma benhamiae CBS 112371    | Aben               | human dermatophyte                                        | +         | -                   | -                   |
| Aspergillus aculeatus               | Aspac1             | soil, tomato, grape                                       | +         | -                   | -                   |
| Aspergillus carbonarius ITEM 5010   | Acar               | Grape berry, Brindis, Apulia, Italy. soil, manure, wheat, | +         | -                   | -                   |
| Aspergillus clavatus NRRL 1         | Acla               | barley, maize                                             | +         | -                   | -                   |
| Aspergillus flavus NRRL 3357        | Afla               | corn, peanuts, cottonseed                                 | +         | +                   | -                   |
| Aspergillus fumigatus Af293         | Afum               | corn silage, lung tissue                                  | +         | +                   | -                   |
| Aspergillus nidulans FGSC A4        | Anid               | laboratory strain                                         | +         | -                   | -                   |
| Aspergillus niger                   | Anig               | fruit, nuts, peanuts, cereal, meat, cheese                | +         | +                   | -                   |
| Aspergillus oryzae RIB40/ATCC 42149 | Aory               | cereal                                                    | +         | +                   | -                   |
| Aspergillus terreus                 | Ater               | soil, stored cereal                                       | +         | +                   | -                   |
| Baudonia compniacensis UAMH 10762   | Bauco1             | Exterior surfaces around distilleries                     | +         | -                   | -                   |
| Blastomyces dermatitidis            | Bder               | soil, pathogen of mammals                                 | +         | -                   | -                   |

|                                            |         |                                                                                                                        |   |   |   |
|--------------------------------------------|---------|------------------------------------------------------------------------------------------------------------------------|---|---|---|
| Botrytis cinerea                           | Bcin    | pathogen of plants:<br>vegetables, fruits,<br>shrubs, trees,<br>flowers, weeds<br>waterborne fungus<br>associated with | - | - | - |
| Capronia coronata cbs 617.96               | Capco1  | plants<br>hyperparasite<br>associated with                                                                             | - | - | - |
| Capronia epimyces cbs 606.96               | Capep1  | plants                                                                                                                 | + | - | - |
| Cercospora zea-maydis<br>SCOH1-5           | Cerzm1  | pathogen of maize                                                                                                      | - | - | - |
| Chaetomium globosum CBS<br>148.51          | Cglo    | decaying plant<br>material                                                                                             | - | - | - |
| Cladonia grayi                             | Cgra    | lichen                                                                                                                 | - | - | - |
| Cladophialophora psammophila<br>cbs 110553 | Claps1  | hydrocarbon<br>degrader                                                                                                | + | - | + |
| Cladophialophora yegresii cbs<br>114405    | Claye1  | epiphyte of cactus<br>spines                                                                                           | + | - | + |
| Cladosporium fulvum                        | Clafu1  | pathogen of tomato                                                                                                     | - | - | - |
| Coccidioides immitis                       | Cimm    | pathogen of humans                                                                                                     | + | - | - |
| Coccidioides posadasii                     | Cpos    | pathogen of humans                                                                                                     | + | - | - |
| Cochliobolus heterostrophus C4             | CocheC4 | pathogen of maize                                                                                                      | + | + | - |
| Cochliobolus heterostrophus C5             | CocheC5 | pathogen of<br>sorghum;<br>opportunistic                                                                               | + | + | - |
| Cochliobolus lunatus m118                  | Coclu2  | pathogen of humans                                                                                                     | + | + | - |
| Cochliobolus sativus ND90Pr                | Cocsa1  | Tester for mating                                                                                                      | + | - | - |

|                                                   |        |                                               |   |   |   |
|---------------------------------------------------|--------|-----------------------------------------------|---|---|---|
| Coniosporium apollinis cbs<br>100218              | Conap1 | type A<br>rock-inhabiting<br>fungus           | - | - | - |
| Cryphonectria parasitica EP 155                   | Cprs   | pathogen of<br>chestnut trees                 | - | - | + |
| Dothistroma septosporum<br>NZE10                  | Dotse1 | pathogen of pine                              | - | - | - |
| Exophiala aquamarina cbs<br>119918                | Exoaq1 | marine animal<br>pathogen                     | + | - | - |
| Exophiala dermatitidis UT8656                     | Eder   | pathogen of humans                            | + | - | + |
| Fusarium graminearum                              | Fgra   | pathogen of wheat<br>and barley;<br>endophyte | - | - | + |
| Fusarium oxysporum                                | Foxy   | pathogen of fruit;<br>endophyte               | - | - | - |
| Fusarium verticillioides 7600                     | Fver   | pathogen of maize;<br>endophyte               | - | - | - |
| Gaeumannomyces graminis var.<br>tritici r3-111a-1 | Gaegr1 | pathogen of wheat<br>and barley               | - | - | + |
| Geomyces destructans 20631-<br>21                 | Gdes   | brown bat<br>bird/bat feces;<br>pathogen of   | - | - | - |
| Histoplasma capsulatum                            | Hcap   | mammals                                       | + | - | - |
| Hysterium pulicare                                | Hyspu1 | Ascospore from<br>Betula nigra                | + | - | - |
| Leptosphaeria maculans                            | Lepmu1 | pathogen of oilseed<br>rape                   | + | - | - |
| Magnaporthe oryzae 70-                            | Mory   | pathogen of rice                              | - | + | - |

15(MG6)

|                                       |        |                                                                 |   |   |   |
|---------------------------------------|--------|-----------------------------------------------------------------|---|---|---|
| Magnaporthe poae ATCC 64411           | Mpoa   | pathogen of rice                                                | - | - | - |
| Microsporium canis CBS 113480         | Mcan   | Head of 3-year-old patient, Wurzburg, Germany.                  | + | - | - |
| Microsporium gypseum 118893           | Mgyp   | Skin of patient, Uganda.                                        | + | - | - |
| Mycospharella fijiensis 10313         | Mfij   | pathogen of banana                                              | - | - | - |
| Mycospharella graminicola 11395       | Mgra   | pathogen of wheat                                               | - | - | - |
| Nectria haematococca MPV1             | Nhae   | plant pathogen, wide host range                                 | - | - | + |
| Neosartorya fischeri NRRL 181         | Nfis   | soil, canned food                                               | + | - | - |
| Neurospora crassa OR74A               | Ncra   | decaying plant material                                         | - | - | - |
| Neurospora discreta FHSC 8579         | Ndis   | forest fire remains (trees)                                     | - | - | - |
| Neurospora tetrasperma FGSC 2508 matA | Ntet   | decaying plant material                                         | - | - | - |
| Oidiodendron maius Zn                 | Oidma1 | endophyte of ericaceous plants                                  | - | - | + |
| Paracoccidioides brasiliensis Pb01    | Pbra   | human cervical lymph node, Belo Horizonte, Minas Gerais, Brazil | + | - | - |
| Penicillium chrysogenum Wis. 54-1255  | Pench1 | industrial strain                                               | + | - | + |
| Podospora anserina                    | Pans   | herbivore dung                                                  | - | - | - |
| Pyrenophora teres f. teres            | Pyrtt1 | pathogen of barley                                              | + | - | - |

|                                               |             |                                                                                                |   |   |   |
|-----------------------------------------------|-------------|------------------------------------------------------------------------------------------------|---|---|---|
| <i>Pyrenophora tritici-repentis</i>           | Ptri        | Pathogen of grass<br>saprobic with<br>diverse habitats;<br>wood of<br>dicotyledonous<br>plants | + | - | - |
| <i>Rhytidhysterium rufulum</i>                | Rhyru1      | moist soils,<br>pathogen of wide<br>variety of plants                                          | + | - | - |
| <i>Sclerotinia sclerotiorum</i> ATCC<br>18683 | Sscl        | pathogen of poplars                                                                            | - | - | - |
| <i>Septoria musiva</i> S02202                 | Sepmu1      | pathogen of maize<br>decaying plant                                                            | - | - | - |
| <i>Setosphaeria turcica</i> Et28A             | Settu1      | decaying plant<br>material                                                                     | + | + | - |
| <i>Sporotrichum thermophile</i>               | Spoth2      | pathogen of wheat                                                                              | - | - | - |
| <i>Stagnospora nodorum</i> SN15               | Snod        | thermophile                                                                                    | + | - | - |
| <i>Thielavia terrestris</i> NRRL 8126         | Tter        | soil, endophyte,<br>mycoparasite                                                               | - | - | - |
| <i>Trichoderma asperellum</i> CBS<br>433.97   | Trias1      | soil, endophyte,<br>mycoparasite                                                               | - | - | - |
| <i>Trichoderma atroviride</i> IMI<br>206040   | Tatr        | soil, endophyte,<br>mycoparasite<br>soil, endophyte,<br>mycoparasite, wood<br>decay            | - | - | - |
| <i>Trichoderma harzianum</i>                  | Triha1      | soil, wood decay                                                                               | - | - | - |
| <i>Trichoderma reesei</i>                     | Tree        | soil, wood decay                                                                               | - | - | - |
| <i>Trichoderma reesei</i> RUT C-30            | TrireRUTC30 | soil, wood decay<br>soil, endophyte,<br>mycoparasite                                           | - | - | - |
| <i>Trichoderma virens</i> Gv29-8              | Tvir        | soil, endophyte,<br>mycoparasite                                                               | - | - | + |
| <i>Trichophyton equinum</i> CBS<br>127.97     | Tequ        | horse                                                                                          | + | - | - |
| <i>Trichophyton rubrum</i> CBS                | Trub        | Patient with                                                                                   | + | - | - |



|                                                      |              |                                                                             |   |   |   |
|------------------------------------------------------|--------------|-----------------------------------------------------------------------------|---|---|---|
| 118892                                               |              | onychomycosis,<br>Germany.<br>cheek of man,<br>Montreal, Quebec,<br>Canada. |   |   |   |
| Trichophyton tonsurans CBS<br>112818                 | Tton         |                                                                             | + | - | - |
| Trichophyton verrucosum<br>HKI0517                   | Tver         | bovine                                                                      | + | - | - |
| Uncinocarpus reesii 1704                             | Uree         | soil                                                                        | + | - | - |
| Verticillium albo-atrum                              | Valb         | soil, pathogen of<br>alfalfa, cotton, hops                                  | - | - | - |
| Verticillium dahliae                                 | Vdah         | soil, pathogen of<br>wide variety of<br>plants                              | - | - | - |
| Xanthoria parietina 46-1                             | Xanpa1       | lichen                                                                      | - | - | - |
| <b>Other genomes investigated</b>                    |              |                                                                             |   |   |   |
| Agaricus bisporus var. bisporus                      | Abibi        |                                                                             |   |   |   |
| Agaricus bisporus var. burnettii                     | Abibu        |                                                                             |   |   |   |
| Acidomyces richmondensis                             | Aciri1iso    |                                                                             |   |   |   |
| Allomyces macrogynus                                 | Amac         |                                                                             |   |   |   |
| Aspergillus niger                                    | Anigcbs51388 |                                                                             |   |   |   |
| Ascoidea rubescens NRRL<br>Y17699                    | Ascru1       |                                                                             |   |   |   |
| Aspergillus brasiliensis                             | Aspbr1       |                                                                             |   |   |   |
| Aspergillus acidus                                   | Aspfo1       |                                                                             |   |   |   |
| Aspergillus sydowii                                  | Aspsy1       |                                                                             |   |   |   |
| Aspergillus versicolor                               | Aspve1       |                                                                             |   |   |   |
| Auricularia delicata SS-5                            | Aurde1       |                                                                             |   |   |   |
| Aureobasidium pullulans var.<br>subglaciale EXF-2481 | Aurpuvarsub1 |                                                                             |   |   |   |

|                                          |         |
|------------------------------------------|---------|
| Babjeviella inositovora NRRL Y-12698     | Babin1  |
| Batrachochytrium dendrobatidis           | Bden    |
| Bjerkandera adusta                       | Bjead1  |
| Botryobasidium botryosum                 | Botbo1  |
| Candida albicans                         | Calb    |
| Candida arabinof fermentans NRRL YB-2248 | Canar1  |
| Candida caseinolytica Y-17796            | Canca1  |
| Candida tanzawaensis NRRL Y-17324        | Canta1  |
| Candida tenuis NRRL Y-1498               | Cante1  |
| Catenaria anguillulae PL171              | Catan1  |
| Coprinopsis cinerea                      | Ccin    |
| Candida glabrata                         | Cgla138 |
| Candida guilliermondii                   | Cgui    |
| Cochliobolus heterostrophus              | Chet    |
| Cladophialophora carrionii cbs 160.54    | Claca1  |
| Cladonia grayi(newer annotation)         | Clagr2  |
| Candida lusitaniae                       | Clus    |
| Cryptococcus neoformans                  | Cneb    |
| Cryptococcus gattii                      | Cneg    |
| Cryptococcus neoformans                  | Cnej    |
| Cryptococcus neoformans var. grubii      | Cneo    |
| Cryptococcus gattii                      | Cnew    |

|                                             |        |
|---------------------------------------------|--------|
| Cochliobolus carbonum 26-R-13               | Cocca1 |
| Cochliobolus miyabeanus ATCC<br>44560       | Cocmi1 |
| Cochliobolus victoriae FI3                  | Cocvi1 |
| Coemansia reversa NRRL 1564                 | Coere1 |
| Conidiobolus coronatus<br>NRRL28638         | Conco1 |
| Coniophora puteana                          | Conpu1 |
| Candida parapsilosis                        | Cpar   |
| Cronartium quercuum f. sp.<br>fusiforme G11 | Croqu1 |
| Ceriporiopsis subvermispora                 | Csub   |
| Candida tropicalis                          | Ctro   |
| Dacryopinax sp. DJM 731 SSP1                | Dacsp1 |
| Dekkera bruxellensis CBS 2499               | Dekbr2 |
| Debaryomyces hansenii                       | Dhan   |
| Dichomitus squalens                         | Dicsq1 |
| Encephalitozoon cuniculi                    | Ecun   |
| Eremothecium cymbalariae                    | Ecym   |
| Eremothecium gossypii                       | Egos   |
| Encephalitozoon intestinalis<br>ATCC 50506  | Eint   |
| Fomitiporia mediterranea                    | Fomme1 |
| Fomitopsis pinicola SS1                     | Fompi1 |
| Galerina marginata                          | Galma1 |
| Gonapodya prolifera                         | Ganpr1 |
| Gloeophyllum trabeum                        | Glotr1 |
| Gymnopus luxurians                          | Gymlu1 |

|                                                          |        |
|----------------------------------------------------------|--------|
| <i>Heterobasidion annosum</i>                            | Hann   |
| <i>Hanseniaspora valbyensis</i> NRRL Y-1626              | Hanva1 |
| <i>Hebeloma cylindrosporum</i> h7                        | Hebcy1 |
| <i>Hansenula polymorpha</i>                              | Hpol   |
| <i>Hydnomerulius pinastri</i>                            | Hydpi1 |
| <i>Hydnomerulius pinastri</i>                            | Hydpi2 |
| <i>Hyphopichia burtonii</i> NRRL Y-1933                  | Hypbu1 |
| <i>Hypholoma sublateritium</i>                           | Hypsu1 |
| <i>Jaapia argillacea</i>                                 | Jaaar1 |
| <i>Kluyveromyces lactis</i>                              | Klac   |
| <i>Kluyveromyces thermotolerans</i>                      | Kthe   |
| <i>Kluyveromyces waltii</i>                              | Kwal   |
| <i>Laccaria bicolor</i>                                  | Lbic   |
| <i>Lodderomyces elongisporus</i>                         | Lelo   |
| <i>Lipomyces starkeyi</i> NRRL Y-11557                   | Lipst1 |
| <i>Mucor circinelloides</i>                              | Mcir   |
| <i>Metschnikowia bicuspidata</i> NRRL YB-4993            | Metbi1 |
| <i>Malassezia globosa</i>                                | Mglo   |
| <i>Mixia osmundae</i> IAM 14324                          | Mixos1 |
| <i>Melampsora laricis-populina</i>                       | Mlar   |
| <i>Nadsonia fulvescens</i> var. <i>elongata</i> DSM 6958 | Nadfu1 |
| <i>Paxillus involutus</i> ATCC 200175                    | Paxin1 |
| <i>Phycomyces blakesleeanus</i>                          | Pbla   |
| <i>Phanerochaete chrysosporium</i>                       | Pchr   |

|                                                |            |
|------------------------------------------------|------------|
| <i>Puccinia graminis</i> f. sp. <i>Tritici</i> | Pgra       |
| <i>Phanerochaete carnosae</i> HHB-10118-Sp     | Phaca1     |
| <i>Phialophora europaea</i> cbs 101466         | Phieu1     |
| <i>Phlebiopsis gigantea</i>                    | Phlgi1     |
| <i>Pichia membranifaciens</i>                  | Picme2     |
| <i>Piloderma croceum</i> F 1598                | Pilcr1     |
| <i>Piromyces</i> sp. E2                        | PirE2      |
| <i>Pisolithus microcarpus</i> 441              | Pismi1     |
| <i>Pisolithus tinctorius</i> Marx 270          | Pisti1     |
| <i>Plicaturopsis crispa</i>                    | Plicr1     |
| <i>Postia placenta</i> MAD-698-R-SB12          | PosplRSB12 |
| <i>Pleurotus ostreatus</i>                     | Post       |
| <i>Pichia pastoris</i> GS115                   | Ppas       |
| <i>Postia placenta</i>                         | Ppla       |
| <i>Pichia stipitis</i>                         | Psti       |
| <i>Punctularia strigosozonata</i>              | Punst1     |
| <i>Puccinia triticina</i> 1-1BBBD Race 1       | Putr       |
| <i>Rhodotorula graminis</i> strain WP1         | Rhoba1     |
| <i>Rhizopus oryzae</i>                         | Rory       |
| <i>Saitoella complicata</i> NRRL Y-17804       | Saico1     |
| <i>Saccharomyces bayanus</i>                   | Sbay       |
| <i>Saccharomyces castellii</i>                 | Scas       |
| <i>Saccharomyces cerevisiae</i>                | Scer       |

|                                                    |              |
|----------------------------------------------------|--------------|
| <i>Scleroderma citrinum</i> Foug A                 | Sclici1      |
| <i>Schizophyllum commune</i>                       | Scom         |
| <i>Sebacina vermifera</i> MAFF<br>305830           | Sebve1       |
| <i>Serpula lacrymans</i> S7                        | SerlaS7      |
| <i>Serpula lacrymans</i> var<br>shastensis SHA21-2 | Serlavarsha1 |
| <i>Schizosaccharomyces japonicus</i>               | Sjap         |
| <i>Saccharomyces kluuyveri</i>                     | Sklu         |
| <i>Saccharomyces kudriavzevii</i>                  | Skud         |
| <i>Serpula lacrymans</i>                           | Slac         |
| <i>Saccharomyces mikatae</i>                       | Smik         |
| <i>Schizosaccharomyces</i><br>octosporus           | Soct         |
| <i>Schizosaccharomyces</i><br>cryophilus           | Soyt         |
| <i>Spathaspora passalidarum</i> NRRL<br>Y-27907    | Spapa3       |
| <i>Saccharomyces paradoxus</i>                     | Spar         |
| <i>Sphaerobolus stellatus</i>                      | Sphst1       |
| <i>Schizosaccharomyces pombe</i>                   | Spom         |
| <i>Spizellomyces punctatus</i>                     | Spun         |
| <i>Sporobolomyces roseus</i>                       | Sros         |
| <i>Stereum hirsutum</i> FP-91666 SS1               | Stehi1       |
| <i>Tremella mesenterica</i> Fries                  | Tmes         |
| <i>Tetrapisispora phaffii</i> CBS 4417             | Tpha         |
| <i>Trametes versicolor</i>                         | Trave1       |
| <i>Tulasnella calospora</i> AL13/4D                | Tulca1       |
| <i>Ustilago maydis</i>                             | Umay         |

|                              |        |
|------------------------------|--------|
| Vanderwaltozyma_polyspora    | Vpol   |
| Wickerhamomyces anomalus     | Wican1 |
| Wolfiporia cocos MD-104 SS10 | Wolco1 |
| Yarrowia lipolytica          | Ylip   |
| Zygosaccharomyces rouxii     | Zrou   |

Table S2. Comparison of function-related residues among gentisate 1,2 dioxygenase homologs in fungi and bacteria.

| <b>function</b>                                  | <b><i>P. salicylatoxidans</i></b> | <b>Bacteria</b> | <b><i>A. fumigatus</i></b> |
|--------------------------------------------------|-----------------------------------|-----------------|----------------------------|
| Active site, conserved; stabilizes 4°            | Leu(38)                           | Leu             | Leu(31)                    |
| Closure of active site                           | Leu(42)                           | L/E/I/M/V       | Met                        |
| Active site                                      | Leu(45)                           | L/F/V/M         | Leu(38)                    |
| Active site                                      | Met(46)                           | V/M/G/I/L       | Asn(39)                    |
| Closure of active site                           | Arg(79)                           | K/R/E/D         | Lys                        |
| Active site                                      | Glu(82)                           | E/V/Q/I         | Glu(74)                    |
| Active site; closure of AS; stabilizes 4°        | Arg(83)                           | Arg             | Arg(75)                    |
|                                                  | Arg(84)                           | Arg             | Arg(76)                    |
| Active site; stabilizes 4°                       | Ala(85)                           | Val>Ala         | Val(77)                    |
| Active site                                      | Trp(104)                          | Tyr>Trp         | Tyr(95)                    |
| Substrate selection/binding                      | Gly(106)                          | Gly>>Ala        | Gly(97)                    |
| Active site, conserved                           | Gln(108)                          | Gln             | Gln(99)                    |
|                                                  | Arg(113)                          | Gly>K/R         | Asn(104)                   |
| Active site closure                              | Glu(118)                          | S/A/E/T         | Ala                        |
| Active site                                      | Gln(123)                          | Q>A/P           | Ala(114)                   |
| Active site; Coordination of metal ion/substrate | Ala(125)                          | Ala             | Ala(116)                   |
| Active site, conserved                           | Arg(127)                          | Arg             | Arg(118)                   |
| Active site                                      | Thr(137)                          | Thr             | Thr(128)                   |
| Hydrophobic shielding of active site             | Trp(157)                          | Trp>G/M         | Trp(148)                   |
| Active site, conserved                           | His(162)                          | His             | His(153)                   |
| Active site, conserved                           | Trp(172)                          | Trp             | Trp(163)                   |
| Active site, conserved                           | Asp(174)                          | Asp             | Asp(165)                   |
| Active site, conserved                           | Leu(176)                          | Leu             | Leu(167)                   |
| Active site                                      | Ile(178)                          | I/L/V           | Ile(169)                   |
| Stabilizes 4°                                    | Phe*(189)                         | Y/G/H/F/S       | Val(180)                   |
| Closure of active site                           | Asp(194)                          | E/L/D/Q         | -                          |
|                                                  | Gln(208)                          | A/E/S/P/T       |                            |
